# Supplementary material for: A synthetic approach towards drug modification: 2-hydroxy-1-naphthaldehyde based imine-zwitterion preparation, single-crystal study, Hirshfeld surface analysis, and computational investigation
Source: Royal Society of Chemistry journal article supplement (doi:10.1039/d3ra08727a), 2024-01-01
Supplement: d3ra08727a1.pdf [file d3ra08727a1.pdf]

## Supplementary Information File

### **A synthetic approach towards drugs modification: 2-hydroxy-1-naphthaldehyde based imine-zwitterion preparation, single-crystal study, Hirshfeld surface analysis, and computational investigation**

Abida Naseem Malik,<sup>a</sup> Akbar Ali,<sup>\*b</sup> Muhammad Ashfaq,<sup>\*a</sup> Muhammad Nawaz Tahir,<sup>a</sup> Mohammad Mahtab Alam,<sup>c</sup> Mohamed S. Mostafa,<sup>d</sup> Aleksey Kuznetsov<sup>\*e</sup>

<sup>a</sup> Department of Physics, University of Sargodha, Sargodha 40100, Pakistan

<sup>b</sup> Department of Chemistry, Government College University Faisalabad, 38000-Faisalabad Pakistan

<sup>c</sup> Department of Basic Medical Sciences, College of Applied Medical Science, King Khalid University, Abha 61421, Saudi Arabia.

<sup>d</sup> Department of Chemistry, Faculty of Science, Jazan University, P.O. Box 114, Jazan 45142, Saudi Arabia

<sup>e</sup> Departamento de Química, Campus Santiago Vitacura, Universidad Tecnica Federico Santa María, Av. Santa María 6400 Vitacura, 7660251, Chile

#### **Contents:**

- 1. Table S1: Enrichment ratio for the pair of chemical species in DSPIN. Enrichment ratio is not calculated for the pairs which random contact less than 0.99.**
- 2. Table S2: Enrichment ratio for the pair of chemical species in ACPIN. Enrichment ratio is not calculated for the pairs which random contact less than 0.99.**
- 3. Table S3: Interaction energies between molecular pairs in DSPIN.**
- 4. Table S4: Interaction energies between molecular pairs in ACPIN.**
- 5. checkCIF/PLATON report of DSPIN.**
- 6. checkCIF/PLATON report of ACPIN.**
- 7. Table S5: Selected structural parameters for the compounds DSPIN and ACPIN, calculated using the B3LYP/6-311+G(d,p) approach with the implicit solvent effects from ethanol.**
- 8. Table S6. Second-order perturbation theory analysis results for the compounds DSPIN and ACPIN, calculated using the B3LYP/6-311+G(d,p) approach with the implicit solvent effects from ethanol.**

**Table S1:** Enrichment ratio for the pair of chemical species in **DSPIN**. Enrichment ratio is not calculated for the pairs which random contact less than 0.99.

|                          |             |          |          |          |          |          |
|--------------------------|-------------|----------|----------|----------|----------|----------|
| <b>Contact %</b>         | <b>Atom</b> | <b>H</b> | <b>C</b> | <b>N</b> | <b>O</b> | <b>S</b> |
|                          | <b>H</b>    | 31.9     | 22.1     | 6.6      | 20       | 5.6      |
|                          | <b>C</b>    | 22.1     | 7.1      | 1.2      | 3.5      | 0        |
|                          | <b>N</b>    | 6.6      | 1.2      | 0        | 0.2      | 0        |
|                          | <b>O</b>    | 20       | 3.5      | 0.2      | 0        | 1.8      |
|                          | <b>S</b>    | 5.6      | 0        | 0        | 1.8      | 0        |
| <b>Surface%</b>          |             | 59.05    | 20.5     | 4        | 12.75    | 3.7      |
| <b>Random contacts %</b> | <b>Atom</b> | <b>H</b> | <b>C</b> | <b>N</b> | <b>O</b> | <b>S</b> |
|                          | <b>H</b>    | 34.87    |          |          |          |          |
|                          | <b>C</b>    | 24.21    | 4.20     |          |          |          |
|                          | <b>N</b>    | 4.72     | 1.64     | 0.16     |          |          |
|                          | <b>O</b>    | 15.06    | 5.23     | 1.02     | 1.63     |          |
|                          | <b>S</b>    | 4.37     | 1.52     | 0.30     | 0.94     | 0.14     |
| <b>Enrichment ratio</b>  | <b>Atom</b> | <b>H</b> | <b>C</b> | <b>N</b> | <b>O</b> | <b>S</b> |
|                          | <b>H</b>    | 0.91     |          |          |          |          |
|                          | <b>C</b>    | 0.91     | 1.69     |          |          |          |
|                          | <b>N</b>    | 1.40     | 0.73     |          |          |          |
|                          | <b>O</b>    | 1.33     | 0.67     | 0.20     | 0.00     |          |
|                          | <b>S</b>    | 1.28     | 0.00     |          |          |          |

**Table S2:** Enrichment ratio for the pair of chemical species in ACPIN. Enrichment ratio is not calculated for the pairs which random contact less than 0.99.

|                          |             |          |          |          |          |           |
|--------------------------|-------------|----------|----------|----------|----------|-----------|
| <b>Contact %</b>         | <b>Atom</b> | <b>H</b> | <b>C</b> | <b>N</b> | <b>O</b> | <b>Cl</b> |
|                          | <b>H</b>    | 45.1     | 19.5     | 6.7      | 5.2      | 11.4      |
|                          | <b>C</b>    | 19.5     | 6.4      | 1.3      | 1.7      | 0.3       |
|                          | <b>N</b>    | 6.7      | 1.3      | 0        | 0.3      | 0.1       |
|                          | <b>O</b>    | 5.2      | 1.7      | 0.3      | 0.4      | 0.1       |
|                          | <b>Cl</b>   | 11.4     | 0.3      | 0.1      | 0.1      | 1.5       |
| <b>Surface%</b>          |             | 66.5     | 17.8     | 4.2      | 4.05     | 7.45      |
| <b>Random contacts %</b> | <b>Atom</b> | <b>H</b> | <b>C</b> | <b>N</b> | <b>O</b> | <b>Cl</b> |
|                          | <b>H</b>    | 44.22    |          |          |          |           |
|                          | <b>C</b>    | 23.67    | 3.17     |          |          |           |
|                          | <b>N</b>    | 5.59     | 1.50     | 0.18     |          |           |
|                          | <b>O</b>    | 5.39     | 1.44     | 0.34     | 0.16     |           |
|                          | <b>Cl</b>   | 9.91     | 2.65     | 0.63     | 0.60     | 0.56      |
| <b>Enrichment ratio</b>  | <b>Atom</b> | <b>H</b> | <b>C</b> | <b>N</b> | <b>O</b> | <b>Cl</b> |
|                          | <b>H</b>    | 1.02     |          |          |          |           |
|                          | <b>C</b>    | 0.82     | 2.02     |          |          |           |
|                          | <b>N</b>    | 1.20     | 0.87     |          |          |           |
|                          | <b>O</b>    | 0.97     | 1.18     |          |          |           |
|                          | <b>Cl</b>   | 1.15     | 0.11     |          |          |           |

**Table S3:** Interaction energies between molecular pairs in DSPIN.

| Crystal                                                                                                                                                             | Atoms | Surface           | Energies |                  |        |       |       |       |        |  |
|---------------------------------------------------------------------------------------------------------------------------------------------------------------------|-------|-------------------|----------|------------------|--------|-------|-------|-------|--------|--|
| Interaction Energies (kJ/mol)                                                                                                                                       |       |                   |          |                  |        |       |       |       |        |  |
| R is the distance between molecular centroids (mean atomic position) in Å.                                                                                          |       |                   |          |                  |        |       |       |       |        |  |
| Total energies, only reported for two benchmarked energy models, are the sum of the four energy components, scaled appropriately (see the scale factor table below) |       |                   |          |                  |        |       |       |       |        |  |
| -----                                                                                                                                                               |       |                   |          |                  |        |       |       |       |        |  |
|                                                                                                                                                                     | N     | Symop             | R        | Electron Density | E_ele  | E_pol | E_dis | E_rep | E_tot  |  |
|                                                                                                                                                                     | 1     | -x, -y, -z        | 7.34     | B3LYP/6-31G(d,p) | -8.1   | -3.6  | -66.8 | 35.7  | -47.3  |  |
|                                                                                                                                                                     | 2     | -x, y+1/2, -z+1/2 | 16.26    | B3LYP/6-31G(d,p) | -3.0   | -0.5  | -9.4  | 0.0   | -11.7  |  |
|                                                                                                                                                                     | 2     | -x, y+1/2, -z+1/2 | 9.29     | B3LYP/6-31G(d,p) | -6.6   | -3.2  | -17.4 | 9.8   | -18.5  |  |
|                                                                                                                                                                     | 1     | x, y, z           | 7.84     | B3LYP/6-31G(d,p) | -8.2   | -3.5  | -8.9  | 2.4   | -17.5  |  |
|                                                                                                                                                                     | 0     | -x, -y, -z        | 13.10    | B3LYP/6-31G(d,p) | 7.4    | -1.7  | -5.1  | 0.0   | 2.1    |  |
|                                                                                                                                                                     | 1     | -x, -y, -z        | 6.32     | B3LYP/6-31G(d,p) | -19.9  | -7.5  | -99.0 | 56.8  | -77.7  |  |
|                                                                                                                                                                     | 2     | x, -y+1/2, z+1/2  | 10.73    | B3LYP/6-31G(d,p) | -15.8  | -5.0  | -16.5 | 23.9  | -20.1  |  |
|                                                                                                                                                                     | 0     | -x, y+1/2, -z+1/2 | 7.93     | B3LYP/6-31G(d,p) | -21.3  | -8.9  | -33.4 | 29.0  | -40.2  |  |
|                                                                                                                                                                     | 2     | x, -y+1/2, z+1/2  | 11.34    | B3LYP/6-31G(d,p) | -2.5   | -1.5  | -20.1 | 11.2  | -14.3  |  |
|                                                                                                                                                                     | 0     | -x, -y, -z        | 11.78    | B3LYP/6-31G(d,p) | -121.0 | -29.5 | -30.7 | 99.1  | -115.3 |  |
| -----                                                                                                                                                               |       |                   |          |                  |        |       |       |       |        |  |
| Scale factors for benchmarked energy models                                                                                                                         |       |                   |          |                  |        |       |       |       |        |  |
| See Mackenzie et al. IUCrJ (2017)                                                                                                                                   |       |                   |          |                  |        |       |       |       |        |  |
| -----                                                                                                                                                               |       |                   |          |                  |        |       |       |       |        |  |
| Energy Model                                                                                                                                                        | k_ele | k_pol             | k_disp   | k_rep            |        |       |       |       |        |  |
| CE-HF ... HF/3-21G electron densities                                                                                                                               | 1.019 | 0.651             | 0.901    | 0.811            |        |       |       |       |        |  |
| CE-B3LYP ... B3LYP/6-31G(d,p) electron densities                                                                                                                    | 1.057 | 0.740             | 0.871    | 0.618            |        |       |       |       |        |  |

**Table S4:** Interaction energies between molecular pairs in ACPIN.

Interaction Energies (kJ/mol)

R is the distance between molecular centroids (mean atomic position) in Å.

Total energies, only reported for two benchmarked energy models, are the sum of the four energy components, scaled appropriately (see the scale factor table below)

|  | N | Symop      | R     | Electron Density | E_ele | E_pol | E_dis | E_rep | E_tot |
|--|---|------------|-------|------------------|-------|-------|-------|-------|-------|
|  | 1 | -x, -y, -z | 18.35 | B3LYP/6-31G(d,p) | -0.7  | -0.3  | -11.3 | 0.0   | -10.8 |
|  | 2 | x, y, z    | 4.54  | B3LYP/6-31G(d,p) | 1.2   | -4.4  | -91.7 | 43.7  | -54.9 |
|  | 1 | -x, -y, -z | 6.34  | B3LYP/6-31G(d,p) | -11.4 | -2.4  | -52.1 | 28.7  | -41.5 |
|  | 2 | x, y, z    | 18.31 | B3LYP/6-31G(d,p) | -1.0  | -0.1  | -4.5  | 0.0   | -5.0  |
|  | 1 | -x, -y, -z | 7.26  | B3LYP/6-31G(d,p) | -91.3 | -21.3 | -41.7 | 94.2  | -90.4 |
|  | 2 | x, y, z    | 17.67 | B3LYP/6-31G(d,p) | 2.6   | -0.2  | -7.6  | 0.0   | -4.0  |
|  | 1 | -x, -y, -z | 6.25  | B3LYP/6-31G(d,p) | -19.3 | -7.1  | -47.7 | 20.9  | -54.3 |
|  | 1 | -x, -y, -z | 18.64 | B3LYP/6-31G(d,p) | 0.0   | -0.1  | -7.9  | 0.0   | -7.0  |
|  | 1 | -x, -y, -z | 7.29  | B3LYP/6-31G(d,p) | -6.7  | -0.9  | -47.7 | 29.1  | -31.3 |

Scale factors for benchmarked energy models

See Mackenzie et al. IUCrJ (2017)

| Energy Model                                     | k_ele | k_pol | k_disp | k_rep |
|--------------------------------------------------|-------|-------|--------|-------|
| CE-HF ... HF/3-21G electron densities            | 1.019 | 0.651 | 0.901  | 0.811 |
| CE-B3LYP ... B3LYP/6-31G(d,p) electron densities | 1.057 | 0.740 | 0.871  | 0.618 |

**checkCIF/PLATON report of DSPIN**

Structure factors have been supplied for datablock(s) napsuly\_0m

THIS REPORT IS FOR GUIDANCE ONLY. IF USED AS PART OF A REVIEW PROCEDURE FOR PUBLICATION, IT SHOULD NOT REPLACE THE EXPERTISE OF AN EXPERIENCED CRYSTALLOGRAPHIC REFEREE.

No syntax errors found.      CIF dictionary      Interpreting this report

**Datablock: DSPIN.**

Bond precision:      C-C = 0.0034 A      Wavelength=0.71073

Cell:                      a=7.8389(8)              b=13.8151(16)              c=17.198(2)  
                                     alpha=90              beta=94.032(4)              gamma=90  
 Temperature:              296 K

|                        | Calculated       | Reported         |
|------------------------|------------------|------------------|
| Volume                 | 1857.9(4)        | 1857.9(4)        |
| Space group            | P 21/c           | P 21/c           |
| Hall group             | -P 2ybc          | -P 2ybc          |
| Moiety formula         | C20 H15 N3 O3 S2 | C20 H15 N3 O3 S2 |
| Sum formula            | C20 H15 N3 O3 S2 | C20 H15 N3 O3 S2 |
| Mr                     | 409.47           | 409.47           |
| Dx, g cm <sup>-3</sup> | 1.464            | 1.464            |
| Z                      | 4                | 4                |
| Mu (mm <sup>-1</sup> ) | 0.314            | 0.314            |
| F000                   | 848.0            | 848.0            |
| F000'                  | 849.32           |                  |
| h, k, lmax             | 10, 17, 21       | 9, 17, 21        |
| Nref                   | 4049             | 4040             |
| Tmin, Tmax             | 0.904, 0.930     | 0.869, 0.894     |
| Tmin'                  | 0.904            |                  |

Correction method= # Reported T Limits: Tmin=0.869 Tmax=0.894

AbsCorr = MULTI-SCAN

Data completeness= 0.998

Theta (max)= 26.999

R(reflections)= 0.0437 ( 2548)

wR2 (reflections)=

0.1087 ( 4040)

S = 1.018

Npar= 259

The following ALERTS were generated. Each ALERT has the format

**test-name\_ALERT\_alert-type\_alert-level.**

Click on the hyperlinks for more details of the test.

### Alert level C

|                                                                                  |       |      |   |           |
|----------------------------------------------------------------------------------|-------|------|---|-----------|
| PLAT230_ALERT_2_C Hirshfeld Test Diff for                                        | S1    | --O2 | . | 6.6 s.u.  |
| PLAT334_ALERT_2_C Small <C-C> Benzene Dist.                                      | C12   | -C17 | . | 1.37 Ang. |
| PLAT905_ALERT_3_C Negative K value in the Analysis of Variance ... -1.284 Report |       |      |   |           |
| PLAT911_ALERT_3_C Missing FCF Refl                                               |       |      |   |           |
| Between Thmin & STh/L=                                                           | 0.600 |      | 2 | Report    |

### Alert level G

|                                                                    |  |                  |   |             |
|--------------------------------------------------------------------|--|------------------|---|-------------|
| PLAT333_ALERT_2_G Large Aver C6-Ring C-C Dist C1                   |  | -C10             | . | 1.42 Ang.   |
| PLAT432_ALERT_2_G Short Inter X...Y Contact O1                     |  | ..C19            | . | 3.00 Ang.   |
|                                                                    |  | x,1/2-y,-1/2+z = |   | 4_565 Check |
| PLAT480_ALERT_4_G Long H...A H-Bond Reported H3A                   |  | ..S1             | . | 2.89 Ang.   |
| PLAT480_ALERT_4_G Long H...A H-Bond Reported H11                   |  | ..O3             | . | 2.64 Ang.   |
| PLAT910_ALERT_3_G Missing # of FCF Reflection(s) Below Theta(Min). |  |                  |   | 1 Note      |
| PLAT912_ALERT_4_G Missing # of FCF Reflections Above STh/L= 0.600  |  |                  |   | 6 Note      |
| PLAT933_ALERT_2_G Number of HKL-OMIT Records in Embedded .res File |  |                  |   | 1 Note      |
| PLAT941_ALERT_3_G Average HKL Measurement Multiplicity .....       |  |                  |   | 3.8 Low     |
| PLAT967_ALERT_5_G Note: Two-Theta Cutoff Value in Embedded .res .. |  |                  |   | 54.0 Degree |
| PLAT978_ALERT_2_G Number C-C Bonds with Positive Residual Density. |  |                  |   | 1 Info      |

0 **ALERT level A** = Most likely a serious problem - resolve or explain

0 **ALERT level B** = A potentially serious problem, consider carefully

4 **ALERT level C** = Check. Ensure it is not caused by an omission or oversight

10 **ALERT level G** = General information/check it is not something unexpected

0 ALERT type 1 CIF construction/syntax error, inconsistent or missing data

6 ALERT type 2 Indicator that the structure model may be wrong or deficient  
4 ALERT type 3 Indicator that the structure quality may be low  
3 ALERT type 4 Improvement, methodology, query or suggestion  
1 ALERT type 5 Informative message, check

---

---



It is advisable to attempt to resolve as many as possible of the alerts in all categories. Often the minor alerts point to easily fixed oversights, errors and omissions in your CIF or refinement strategy, so attention to these fine details can be worthwhile. In order to resolve some of the more serious problems it may be necessary to carry out additional measurements or structure refinements. However, the purpose of your study may justify the reported deviations and the more serious of these should normally be commented upon in the discussion or experimental section of a paper or in the "special\_details" fields of the CIF. checkCIF was carefully designed to identify outliers and unusual parameters, but every test has its limitations and alerts that are not important in a particular case may appear. Conversely, the absence of alerts does not guarantee there are no aspects of the results needing attention. It is up to the individual to critically assess their own results and, if necessary, seek expert advice.

### **Publication of your CIF in IUCr journals**

A basic structural check has been run on your CIF. These basic checks will be run on all CIFs submitted for publication in IUCr journals (*Acta Crystallographica*, *Journal of Applied Crystallography*, *Journal of Synchrotron Radiation*); however, if you intend to submit to *Acta Crystallographica Section C* or *E* or *IUCrData*, you should make sure that full publication checks are run on the final version of your CIF prior to submission.

### **Publication of your CIF in other journals**

Please refer to the *Notes for Authors* of the relevant journal for any special instructions relating to CIF submission.

Datablock napsuly\_0m - ellipsoid plot

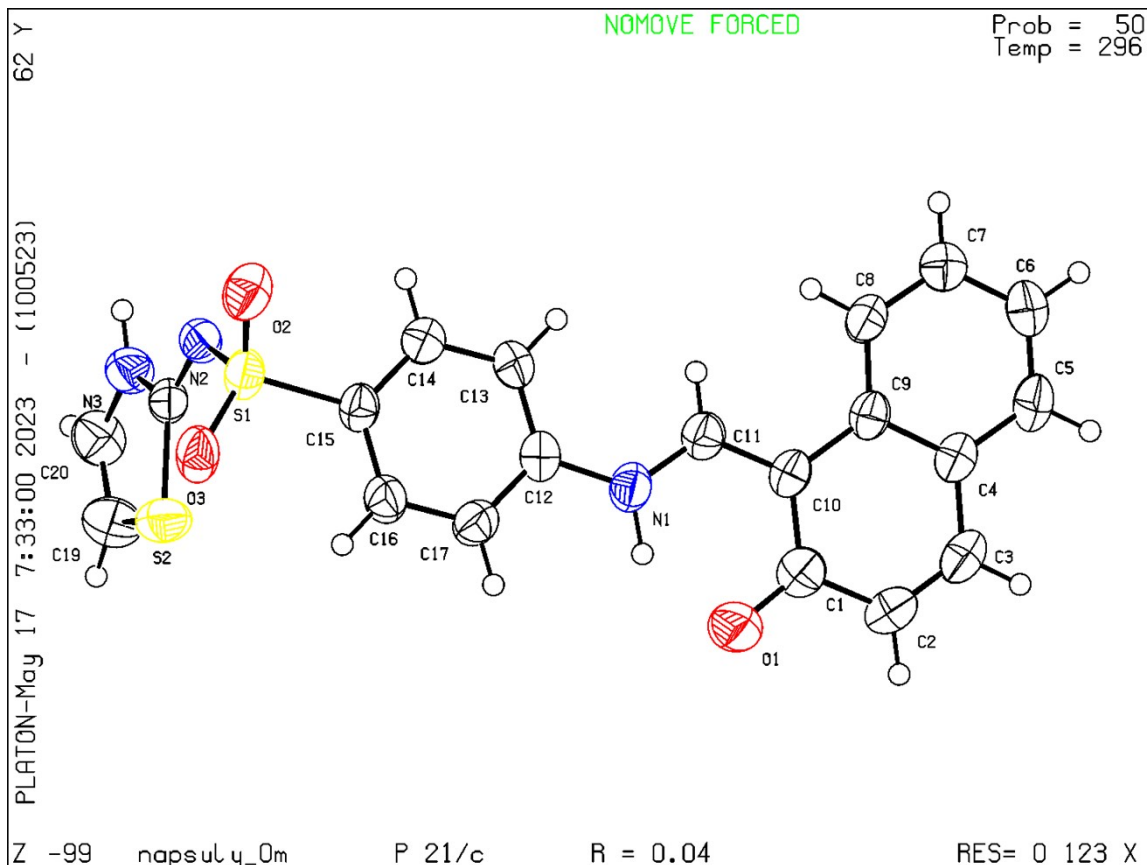**checkCIF/PLATON report of ACPIN.**

Structure factors have been supplied for datablock(s) pymtvan\_twnew

THIS REPORT IS FOR GUIDANCE ONLY. IF USED AS PART OF A REVIEW PROCEDURE FOR PUBLICATION, IT SHOULD NOT REPLACE THE EXPERTISE OF AN EXPERIENCED CRYSTALLOGRAPHIC REFEREE.

No syntax errors found.      CIF dictionary      Interpreting this report

**Datablock: ACPIN**

Bond precision: C-C = 0.0057 A

Wavelength=0.71073

Cell: a=4.5436(6) b=12.5255(16) c=17.673(2)  
 alpha=88.308(8) beta=89.195(8) gamma=82.611(9)  
 Temperature: 296 K

|                        | Calculated      | Reported        |
|------------------------|-----------------|-----------------|
| Volume                 | 997.0(2)        | 996.9(2)        |
| Space group            | P -1            | P -1            |
| Hall group             | -P 1            | -P 1            |
| Moiety formula         | C23 H19 Cl N4 O | C23 H19 Cl N4 O |
| Sum formula            | C23 H19 Cl N4 O | C23 H19 Cl N4 O |
| Mr                     | 402.87          | 402.87          |
| Dx, g cm <sup>-3</sup> | 1.342           | 1.324           |
| Z                      | 2               | 2               |
| Mu (mm <sup>-1</sup> ) | 0.214           | 0.214           |
| F000                   | 420.0           | 420.0           |
| F000'                  | 420.44          |                 |
| h, k, lmax             | 5, 16, 22       | 5, 16, 22       |
| Nref                   | 4543            | 4351            |
| Tmin, Tmax             | 0.940, 0.958    | 0.869, 0.894    |
| Tmin'                  | 0.914           |                 |

Correction method= # Reported T Limits: Tmin=0.869 Tmax=0.894

AbsCorr = MULTI-SCAN

Data completeness= 0.958

Theta(max)= 27.448

R(reflections)= 0.0763( 2397)

wR2(reflections)=  
0.2358( 4351)

S = 1.139

Npar= 264

---

The following ALERTS were generated. Each ALERT has the format

**test-name\_ALERT\_alert-type\_alert-level.**

Click on the hyperlinks for more details of the test.

---

### ■ Alert level C

|                   |                                                                                                                   |                               |              |
|-------------------|-------------------------------------------------------------------------------------------------------------------|-------------------------------|--------------|
| DENSD01_ALERT_1_C | The ratio of the submitted crystal density and that calculated from the formula is outside the range 0.99 <> 1.01 | Crystal density given = 1.324 |              |
|                   | Calculated crystal density =                                                                                      | 1.342                         |              |
| PLAT029_ALERT_3_C | diffn_measured_fraction_theta_full value Low .                                                                    |                               | 0.966 Why?   |
| PLAT046_ALERT_1_C | Reported Z, MW and D(calc) are Inconsistent ....                                                                  |                               | 1.342 Check  |
| PLAT242_ALERT_2_C | Low 'MainMol' Ueq as Compared to Neighbors of                                                                     |                               | C21 Check    |
| PLAT340_ALERT_3_C | Low Bond Precision on C-C Bonds .....                                                                             | 0.00574 Ang.                  |              |
| PLAT906_ALERT_3_C | Large K Value in the Analysis of Variance .....                                                                   |                               | 29.015 Check |
| PLAT906_ALERT_3_C | Large K Value in the Analysis of Variance .....                                                                   |                               | 2.364 Check  |
| PLAT911_ALERT_3_C | Missing FCF Refl Between Thmin & STh/L=                                                                           | 0.600                         | 121 Report   |

---

### ■ Alert level G

|                   |                                                  |            |            |
|-------------------|--------------------------------------------------|------------|------------|
| PLAT007_ALERT_5_G | Number of Unrefined Donor-H Atoms .....          |            | 3 Report   |
| PLAT333_ALERT_2_G | Large Aver C6-Ring C-C Dist C1                   | -C10       | 1.43 Ang.  |
| PLAT870_ALERT_4_G | ALERTS Related to Twinning Effects Suppressed .. |            | ! Info     |
| PLAT910_ALERT_3_G | Missing # of FCF Reflection(s) Below Theta(Min). |            | 1 Note     |
| PLAT912_ALERT_4_G | Missing # of FCF Reflections Above STh/L= 0.600  |            | 70 Note    |
| PLAT931_ALERT_5_G | CIFcalcFCF Twin Law ( 0 0 1)                     | Est.d BASF | 0.18 Check |
| PLAT941_ALERT_3_G | Average HKL Measurement Multiplicity .....       |            | 1.0 Low    |

---

0 **ALERT level A** = Most likely a serious problem - resolve or explain

0 **ALERT level B** = A potentially serious problem, consider carefully

8 **ALERT level C** = Check. Ensure it is not caused by an omission or oversight

7 **ALERT level G** = General information/check it is not something unexpected

2 ALERT type 1 CIF construction/syntax error, inconsistent or missing data

2 ALERT type 2 Indicator that the structure model may be wrong or deficient

7 ALERT type 3 Indicator that the structure quality may be low

2 ALERT type 4 Improvement, methodology, query or suggestion

2 ALERT type 5 Informative message, check

---

It is advisable to attempt to resolve as many as possible of the alerts in all categories. Often the minor alerts point to easily fixed oversights, errors and omissions in your CIF or refinement strategy, so attention to these fine details can be worthwhile. In order to resolve some of the more serious problems it may be necessary to carry out additional measurements or structure refinements. However, the purpose of your study may justify the reported deviations and the more serious of these should normally be commented upon in the discussion or experimental section of a paper or in the "special\_details" fields of the CIF. checkCIF was carefully designed to identify outliers and unusual parameters, but every test has its limitations and alerts that are not important in a particular case may appear. Conversely, the absence of alerts does not guarantee there are no aspects of the results needing attention. It is up to the individual to critically assess their own results and, if necessary, seek expert advice.

### **Publication of your CIF in IUCr journals**

A basic structural check has been run on your CIF. These basic checks will be run on all CIFs submitted for publication in IUCr journals (*Acta Crystallographica*, *Journal of Applied Crystallography*, *Journal of Synchrotron Radiation*); however, if you intend to submit to *Acta Crystallographica Section C* or *E* or *IUCrData*, you should make sure that full publication checks are run on the final version of your CIF prior to submission.

### **Publication of your CIF in other journals**

Please refer to the *Notes for Authors* of the relevant journal for any special instructions relating to CIF submission.

Datablock pymtvan\_twnew - ellipsoid plot

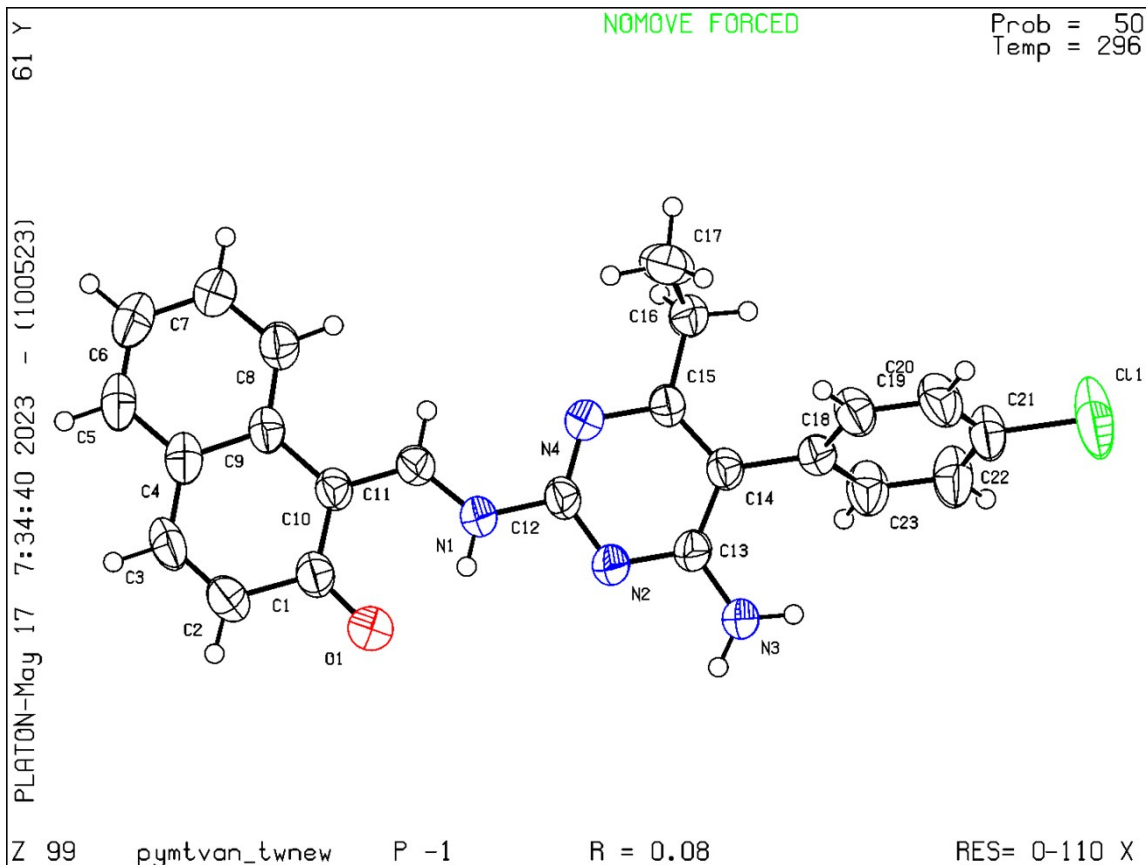**CIF of DSPIN without hkl data**

data\_global

#=====

# PROCESSING SUMMARY (IUCr Office Use only)

\_publ\_contact\_author

;

Muhammad Nawaz Tahir

University of Sargodha

Department of Physics

Sargodha

Pakistan

;

\_publ\_contact\_author\_phone '0092 48 92 30 914'  
\_publ\_contact\_author\_fax '0092 48 32 22 121'  
\_publ\_contact\_author\_email 'dmntahir\_uos@yahoo.com'  
\_publ\_requested\_journal ""  
\_journal\_date\_recd\_electronic ?  
  
\_journal\_date\_to\_coeditor ?  
\_journal\_date\_from\_coeditor ?  
\_journal\_date\_accepted ?  
  
\_journal\_date\_printers\_first ?  
\_journal\_date\_printers\_final ?  
\_journal\_date\_proofs\_out ?  
\_journal\_date\_proofs\_in ?  
  
\_journal\_coeditor\_name ?  
\_journal\_coeditor\_code ?  
\_journal\_paper\_category ?  
\_journal\_coeditor\_notes  
;  
;  
  
\_journal\_techeditor\_code ?  
\_iucr\_compatibility\_tag ?  
\_journal\_techeditor\_notes  
;  
;  
  
\_journal\_coden\_ASTM ?  
\_journal\_name\_full ?  
\_journal\_year ?  
\_journal\_volume ?  
\_journal\_issue ?



\_journal\_page\_first ?  
\_journal\_page\_last ?

\_journal\_suppl\_publ\_number ?  
\_journal\_suppl\_publ\_pages ?

#=====

loop\_  
\_publ\_author\_name  
\_publ\_author\_address

'Muhammad Ashfaq'  
;  
Department of Physics  
University of Sargodha  
Sargodha  
Pakistan  
orcid id: 0000-0001-6663-8777

'Muhammad Nawaz Tahir'  
;  
Department of Physics  
University of Sargodha  
Sargodha  
Pakistan  
orcid id: 0000-0002-6815-9806

'Akbar Ali'  
;  
Department of Chemistry,  
Government College University  
Faisalabad,  
Pakistan.

;

'Abida Naseem Malik'

;

Department of Physics

University of Sargodha

Sargodha

Pakistan

;

'Aleksey Kuznetsov'

;

Departamento de Quimica,

Campus Santiago Vitacura,

Universidad Tecnica Federico Santa Maria,

Av. Santa Maria 6400 Vitacura,

Postal code: 7660251,

Chile

;

\_audit\_creation\_date ?

\_audit\_creation\_method ?

#=====

# TEXT

\_publ\_section\_title

;

1-((Z)-((4-((E)-N-(thiazol-2(3H)-ylidene)sulfamoyl)phenyl)iminio)methyl  
naphthalen-2-olate

;

\_publ\_section\_abstract

;

;

\_publ\_section\_comment

;

;  
\_publ\_section\_exptl\_refinement

;

;

\_publ\_section\_exptl\_prep

;

;

\_publ\_section\_related\_literature

;

;

\_publ\_section\_references

;

Bruker (2007). *SADABS*. Bruker AXS Inc., Madison, Wisconsin, USA.

Bruker (2007). *APEX2* and *SAINT*. Bruker AXS Inc.,  
Madison, Wisconsin, USA.

Farrugia, L. J. (1997). *J. Appl. Cryst.* **30**, 565.

Farrugia, L. J. (2012). *J. Appl. Cryst.* **45**, 849--854.

Sheldrick, G. M. (2008). *Acta Cryst.* A **64**, 112--122.

Sheldrick, G. M. (2015). *Acta Cryst.* C **71**, 3--8.

Spek, A. L. (2009). *Acta Cryst.* D **65**, 148--155.

;

\_publ\_section\_figure\_captions

;

;

\_publ\_section\_acknowledgements

;  
;

data\_napsuly\_0m

\_audit\_creation\_method 'SHELXL-2019/2'

\_shelx\_SHELXL\_version\_number '2019/2'

\_chemical\_name\_common ?

\_chemical\_absolute\_configuration '.'

\_chemical\_name\_systematic

;

1-((Z)-((4-((E)-N-(thiazol-2(3H)-ylidene)sulfamoyl)phenyl)iminio)methyl

naphthalen-2-olate

;

\_chemical\_formula\_moiety 'C20 H15 N3 O3 S2'

\_chemical\_formula\_sum 'C20 H15 N3 O3 S2'

\_chemical\_formula\_iupac 'C20 H15 N3 O3 S2'

\_chemical\_formula\_weight 409.47

loop\_

\_atom\_type\_symbol

\_atom\_type\_description

\_atom\_type\_scatter\_dispersion\_real

\_atom\_type\_scatter\_dispersion\_imag

\_atom\_type\_scatter\_source

'C' 'C' 0.0033 0.0016

'International Tables Vol C Tables 4.2.6.8 and 6.1.1.4'

'H' 'H' 0.0000 0.0000

'International Tables Vol C Tables 4.2.6.8 and 6.1.1.4'

'N' 'N' 0.0061 0.0033

'International Tables Vol C Tables 4.2.6.8 and 6.1.1.4'

'O' 'O' 0.0106 0.0060

'International Tables Vol C Tables 4.2.6.8 and 6.1.1.4'

'S' 'S' 0.1246 0.1234

'International Tables Vol C Tables 4.2.6.8 and 6.1.1.4'

```
_space_group_crystal_system    monoclinic
_space_group_IT_number         14
_space_group_name_H-M_alt      'P 21/c'
_space_group_name_Hall         '-P 2ybc'
```

```
_shelx_space_group_comment
```

```
;
```

The symmetry employed for this shelxl refinement is uniquely defined by the following loop, which should always be used as a source of symmetry information in preference to the above space-group names.

They are only intended as comments.

```
;
```

```
loop_
```

```
_space_group_symop_operation_xyz
```

```
'x, y, z'
```

```
'-x, y+1/2, -z+1/2'
```

```
'-x, -y, -z'
```

```
'x, -y-1/2, z-1/2'
```

```
_cell_length_a      7.8389(8)
_cell_length_b      13.8151(16)
_cell_length_c      17.198(2)
_cell_angle_alpha    90
_cell_angle_beta     94.032(4)
_cell_angle_gamma    90
_cell_volume         1857.9(4)
_cell_formula_units_Z  4
_cell_measurement_reflns_used  2548
_cell_measurement_theta_min  2.374
```

```
_cell_measurement_theta_max      27.000
_cell_measurement_temperature     296(2)
_exptl_crystal_description       prism
_exptl_crystal_colour            'red'
_exptl_crystal_size_max         0.32
_exptl_crystal_size_mid         0.28
_exptl_crystal_size_min         0.23
_exptl_crystal_density_diffn     1.464
_exptl_crystal_density_meas     ?
_exptl_crystal_density_method   'not measured'
_exptl_crystal_F_000            848
_exptl_absorpt_coefficient_mu    0.314
_exptl_absorpt_correction_type   multi-scan
_exptl_absorpt_process_details   '(SADABS; Bruker, 2007)'
_exptl_absorpt_correction_T_min 0.869
_exptl_absorpt_correction_T_max 0.894
_exptl_special_details
;
;

_diffrn_ambient_temperature     296(2)
_diffrn_radiation_type          MoK\alpha
_diffrn_radiation_wavelength    0.71073
_diffrn_radiation_source        'fine-focus sealed tube'
_diffrn_radiation_monochromator  graphite
_diffrn_measurement_device_type  'Bruker Kappa APEXII CCD'
_diffrn_measurement_method      \w
_diffrn_detector_area_resol_mean 7.828
_diffrn_reflns_number           15333
_diffrn_reflns_av_unetl/netl    0.0473
_diffrn_reflns_av_R_equivalents 0.0404
_diffrn_reflns_limit_h_min      -9
```

```

_diffrn_reflns_limit_h_max    9
_diffrn_reflns_limit_k_min   -17
_diffrn_reflns_limit_k_max    15
_diffrn_reflns_limit_l_min   -21
_diffrn_reflns_limit_l_max    21
_diffrn_reflns_theta_min     2.374
_diffrn_reflns_theta_max     26.999
_diffrn_reflns_theta_full    25.242
_diffrn_measured_fraction_theta_max 0.998
_diffrn_measured_fraction_theta_full 0.999
_diffrn_reflns_Laue_measured_fraction_max 0.998
_diffrn_reflns_Laue_measured_fraction_full 0.999
_diffrn_reflns_point_group_measured_fraction_max 0.998
_diffrn_reflns_point_group_measured_fraction_full 0.999
_diffrn_standards_number    0
_diffrn_standards_interval_count  ?
_diffrn_standards_interval_time  ?
_diffrn_standards_decay_%   ?

```

```
_refine_special_details
```

```
;
```

Refinement of  $\langle F \rangle^2$  against ALL reflections. The weighted  $\langle R \rangle$ -factor  $\langle wR \rangle$  and goodness of fit  $\langle S \rangle$  are based on  $\langle F \rangle^2$ , conventional  $\langle R \rangle$ -factors  $\langle R \rangle$  are based on  $\langle F \rangle$ , with  $\langle F \rangle$  set to zero for negative  $\langle F \rangle^2$ . The threshold expression of  $\langle F \rangle^2 > \sqrt{\langle F \rangle^2}$  is used only for calculating  $\langle R \rangle$ -factors(gt) etc. and is not relevant to the choice of reflections for refinement.

$\langle R \rangle$ -factors based on  $\langle F \rangle^2$  are statistically about twice as large as those based on  $\langle F \rangle$ , and  $\langle R \rangle$ - factors based on ALL data will be even larger.

```
;
```

```

_reflns_number_total    4040
_reflns_number_gt       2548

```

```

_reflns_threshold_expression  l>2\s(l)
_refine_ls_structure_factor_coef  Fsqd
_refine_ls_matrix_type  full
_refine_ls_R_factor_all  0.0852
_refine_ls_R_factor_gt  0.0437
_refine_ls_wR_factor_ref  0.1087
_refine_ls_wR_factor_gt  0.0916
_refine_ls_goodness_of_fit_ref  1.018
_refine_ls_restrained_S_all  1.018
_refine_ls_number_reflns  4040
_refine_ls_number_parameters  259
_refine_ls_number_restraints  0
_refine_ls_extinction_method  none
_refine_ls_extinction_coef  .
_refine_ls_hydrogen_treatment  mixed
_refine_ls_weighting_scheme  calc
_refine_ls_weighting_details
'w=1/[\s^2^(Fo^2^)+(0.0429P)^2^+0.3132P] where P=(Fo^2^+2Fc^2^)/3'
_atom_sites_solution_hydrogens  geom
_atom_sites_solution_primary  direct
_atom_sites_solution_secondary  difmap
_refine_ls_shift/su_max  0.000
_refine_ls_shift/su_mean  0.000
_computing_data_collection  'APEX2 (Bruker, 2007)'
_computing_cell_refinement  'SAINT (Bruker, 2007)'
_computing_data_reduction  'SAINT (Bruker, 2007)'
_computing_structure_solution  'SHELXT2014 (Sheldrick, 2008)'
_computing_structure_refinement  'SHELXL-2019/2 (Sheldrick, 2015)'
_computing_molecular_graphics
'ORTEP-3 for Windows (Farrugia, 2012) and PLATON (Spek, 2009)'
_computing_publication_material
;
WinGX (Farrugia, 2012) and PLATON (Spek, 2009)

```



;

loop\_

\_atom\_site\_label

\_atom\_site\_type\_symbol

\_atom\_site\_fract\_x

\_atom\_site\_fract\_y

\_atom\_site\_fract\_z

\_atom\_site\_U\_iso\_or\_equiv

\_atom\_site\_adp\_type

\_atom\_site\_occupancy

\_atom\_site\_site\_symmetry\_order

\_atom\_site\_calc\_flag

\_atom\_site\_refinement\_flags\_posn

\_atom\_site\_refinement\_flags\_adp

\_atom\_site\_refinement\_flags\_occupancy

\_atom\_site\_disorder\_assembly

\_atom\_site\_disorder\_group

S1 S 0.62806(8) 0.37379(5) 0.35983(3) 0.04756(19) Uani 1 1 d . . . . .

S2 S 0.27019(9) 0.27664(5) 0.41242(4) 0.0608(2) Uani 1 1 d . . . . .

O1 O 0.1217(2) 0.41542(13) -0.06501(11) 0.0680(5) Uani 1 1 d . . . . .

O2 O 0.7889(2) 0.42300(13) 0.36955(9) 0.0608(5) Uani 1 1 d . . . . .

O3 O 0.6259(2) 0.27012(12) 0.36427(9) 0.0600(5) Uani 1 1 d . . . . .

N1 N 0.3001(2) 0.48144(15) 0.05142(11) 0.0486(5) Uani 1 1 d . . . . .

H1 H 0.238(3) 0.4297(17) 0.0229(14) 0.058 Uiso 1 1 d . U . . .

N2 N 0.5153(2) 0.42218(13) 0.42388(10) 0.0448(5) Uani 1 1 d . . . . .

N3 N 0.2837(3) 0.42242(15) 0.49937(12) 0.0508(5) Uani 1 1 d . . . . .

H3A H 0.322(3) 0.4750(18) 0.5249(14) 0.061 Uiso 1 1 d . U . . .

C1 C 0.1231(3) 0.49923(19) -0.09520(14) 0.0509(6) Uani 1 1 d . . . . .

C2 C 0.0363(3) 0.5141(2) -0.17026(14) 0.0572(7) Uani 1 1 d . . . . .

H2 H -0.019101 0.462165 -0.195502 0.069 Uiso 1 1 calc R U . . .

C3 C 0.0327(3) 0.6003(2) -0.20484(14) 0.0566(7) Uani 1 1 d . . . . .

H3 H -0.025917 0.606851 -0.253469 0.068 Uiso 1 1 calc R U . . .  
C4 C 0.1162(3) 0.68335(18) -0.16976(13) 0.0479(6) Uani 1 1 d . . . . .  
C5 C 0.1148(3) 0.7723(2) -0.20827(14) 0.0652(8) Uani 1 1 d . . . . .  
H5 H 0.055085 0.778511 -0.256678 0.078 Uiso 1 1 calc R U . . .  
C6 C 0.1997(4) 0.8502(2) -0.17602(15) 0.0700(8) Uani 1 1 d . . . . .  
H6 H 0.197231 0.909269 -0.201978 0.084 Uiso 1 1 calc R U . . .  
C7 C 0.2892(3) 0.8406(2) -0.10451(14) 0.0630(7) Uani 1 1 d . . . . .  
H7 H 0.348124 0.893463 -0.082612 0.076 Uiso 1 1 calc R U . . .  
C8 C 0.2926(3) 0.75469(18) -0.06548(13) 0.0528(6) Uani 1 1 d . . . . .  
H8 H 0.353845 0.750163 -0.017294 0.063 Uiso 1 1 calc R U . . .  
C9 C 0.2064(3) 0.67346(17) -0.09614(12) 0.0424(5) Uani 1 1 d . . . . .  
C10 C 0.2088(3) 0.57993(17) -0.05741(12) 0.0422(5) Uani 1 1 d . . . . .  
C11 C 0.2919(3) 0.56653(18) 0.01579(12) 0.0460(6) Uani 1 1 d . . . . .  
H11 H 0.343968 0.619554 0.040893 0.055 Uiso 1 1 calc R U . . .  
C12 C 0.3795(3) 0.46035(17) 0.12503(12) 0.0433(5) Uani 1 1 d . . . . .  
C13 C 0.4622(3) 0.52816(18) 0.17266(13) 0.0536(6) Uani 1 1 d . . . . .  
H13 H 0.467179 0.592349 0.156691 0.064 Uiso 1 1 calc R U . . .  
C14 C 0.5374(3) 0.50080(18) 0.24386(13) 0.0542(6) Uani 1 1 d . . . . .  
H14 H 0.594324 0.546593 0.275698 0.065 Uiso 1 1 calc R U . . .  
C15 C 0.5292(3) 0.40645(17) 0.26843(12) 0.0422(5) Uani 1 1 d . . . . .  
C16 C 0.4473(3) 0.33821(17) 0.22109(13) 0.0494(6) Uani 1 1 d . . . . .  
H16 H 0.442650 0.274010 0.237083 0.059 Uiso 1 1 calc R U . . .  
C17 C 0.3723(3) 0.36588(18) 0.14980(13) 0.0501(6) Uani 1 1 d . . . . .  
H17 H 0.315809 0.319999 0.117875 0.060 Uiso 1 1 calc R U . . .  
C18 C 0.3718(3) 0.38159(16) 0.44415(12) 0.0431(5) Uani 1 1 d . . . . .  
C19 C 0.1106(3) 0.2962(2) 0.47421(17) 0.0673(8) Uani 1 1 d . . . . .  
H19 H 0.016556 0.255785 0.477583 0.081 Uiso 1 1 calc R U . . .  
C20 C 0.1373(3) 0.3750(2) 0.51617(16) 0.0615(7) Uani 1 1 d . . . . .  
H20 H 0.064756 0.396229 0.553157 0.074 Uiso 1 1 calc R U . . .

loop\_

\_atom\_site\_aniso\_label

\_atom\_site\_aniso\_U\_11

\_atom\_site\_aniso\_U\_22

\_atom\_site\_aniso\_U\_33

\_atom\_site\_aniso\_U\_23

\_atom\_site\_aniso\_U\_13

\_atom\_site\_aniso\_U\_12

S1 0.0609(4) 0.0475(4) 0.0340(3) 0.0018(3) 0.0011(3) 0.0097(3)  
S2 0.0707(5) 0.0502(4) 0.0613(4) -0.0118(3) 0.0032(3) -0.0108(3)  
O1 0.0838(13) 0.0467(12) 0.0711(12) -0.0001(9) -0.0100(10) 0.0007(10)  
O2 0.0509(10) 0.0817(13) 0.0494(10) 0.0020(9) 0.0002(8) 0.0001(9)  
O3 0.0929(13) 0.0448(11) 0.0420(9) 0.0018(8) 0.0019(8) 0.0207(9)  
N1 0.0544(12) 0.0511(14) 0.0393(10) 0.0037(9) -0.0027(9) 0.0033(10)  
N2 0.0608(12) 0.0377(11) 0.0364(10) -0.0015(8) 0.0079(9) -0.0008(10)  
N3 0.0611(13) 0.0444(13) 0.0479(12) -0.0040(10) 0.0103(10) -0.0030(11)  
C1 0.0504(14) 0.0508(17) 0.0512(14) -0.0031(12) 0.0011(11) 0.0082(12)  
C2 0.0574(16) 0.0615(18) 0.0513(15) -0.0113(13) -0.0067(12) -0.0043(13)  
C3 0.0542(15) 0.075(2) 0.0393(13) -0.0036(13) -0.0071(11) 0.0000(14)  
C4 0.0484(14) 0.0577(17) 0.0369(11) 0.0007(11) -0.0011(10) 0.0016(12)  
C5 0.0754(18) 0.074(2) 0.0436(14) 0.0155(14) -0.0134(13) -0.0016(16)  
C6 0.091(2) 0.0604(19) 0.0562(16) 0.0208(14) -0.0119(15) -0.0061(16)  
C7 0.084(2) 0.0512(17) 0.0523(15) 0.0027(13) -0.0073(14) -0.0059(14)  
C8 0.0682(17) 0.0525(16) 0.0361(12) -0.0005(11) -0.0083(11) 0.0005(13)  
C9 0.0437(13) 0.0497(15) 0.0340(11) -0.0001(10) 0.0043(9) 0.0066(11)  
C10 0.0416(13) 0.0501(15) 0.0347(11) -0.0019(10) 0.0021(9) 0.0055(11)  
C11 0.0495(14) 0.0483(16) 0.0401(12) -0.0002(11) 0.0032(10) 0.0033(11)  
C12 0.0436(13) 0.0490(15) 0.0377(12) 0.0057(11) 0.0051(10) 0.0073(11)  
C13 0.0730(17) 0.0409(15) 0.0457(13) 0.0098(11) -0.0040(12) -0.0028(13)  
C14 0.0713(17) 0.0461(16) 0.0439(13) 0.0012(11) -0.0059(12) -0.0030(13)  
C15 0.0488(13) 0.0446(15) 0.0336(11) 0.0010(10) 0.0047(10) 0.0079(11)  
C16 0.0659(16) 0.0398(14) 0.0422(12) 0.0031(11) 0.0018(11) 0.0056(12)  
C17 0.0598(16) 0.0470(16) 0.0424(13) -0.0051(11) -0.0032(11) 0.0016(12)  
C18 0.0574(15) 0.0375(13) 0.0340(11) 0.0023(10) 0.0000(10) 0.0030(12)  
C19 0.0589(17) 0.0621(19) 0.081(2) -0.0010(16) 0.0080(14) -0.0108(14)  
C20 0.0615(18) 0.0620(19) 0.0628(16) 0.0005(14) 0.0160(13) 0.0012(15)

\_geom\_special\_details

;

All esds (except the esd in the dihedral angle between two l.s. planes) are estimated using the full covariance matrix. The cell esds are taken into account individually in the estimation of esds in distances, angles and torsion angles; correlations between esds in cell parameters are only used when they are defined by crystal symmetry. An approximate (isotropic) treatment of cell esds is used for estimating esds involving l.s. planes.

;

loop\_

\_geom\_bond\_atom\_site\_label\_1

\_geom\_bond\_atom\_site\_label\_2

\_geom\_bond\_distance

\_geom\_bond\_site\_symmetry\_2

\_geom\_bond\_publ\_flag

S1 O2 1.4315(17) . ?

S1 O3 1.4344(17) . ?

S1 N2 1.6056(18) . ?

S1 C15 1.762(2) . ?

S2 C19 1.719(3) . ?

S2 C18 1.724(2) . ?

O1 C1 1.269(3) . ?

N1 C11 1.325(3) . ?

N1 C12 1.402(3) . ?

N1 H1 0.98(2) . ?

N2 C18 1.325(3) . ?

N3 C18 1.338(3) . ?

N3 C20 1.370(3) . ?

N3 H3A 0.89(2) . ?

C1 C2 1.431(3) . ?

C1 C10 1.434(3) . ?

C2 C3 1.331(3) . ?  
C2 H2 0.9300 . ?  
C3 C4 1.433(3) . ?  
C3 H3 0.9300 . ?  
C4 C5 1.396(3) . ?  
C4 C9 1.413(3) . ?  
C5 C6 1.362(4) . ?  
C5 H5 0.9300 . ?  
C6 C7 1.379(3) . ?  
C6 H6 0.9300 . ?  
C7 C8 1.362(3) . ?  
C7 H7 0.9300 . ?  
C8 C9 1.394(3) . ?  
C8 H8 0.9300 . ?  
C9 C10 1.453(3) . ?  
C10 C11 1.388(3) . ?  
C11 H11 0.9300 . ?  
C12 C17 1.375(3) . ?  
C12 C13 1.376(3) . ?  
C13 C14 1.374(3) . ?  
C13 H13 0.9300 . ?  
C14 C15 1.373(3) . ?  
C14 H14 0.9300 . ?  
C15 C16 1.375(3) . ?  
C16 C17 1.376(3) . ?  
C16 H16 0.9300 . ?  
C17 H17 0.9300 . ?  
C19 C20 1.315(3) . ?  
C19 H19 0.9300 . ?  
C20 H20 0.9300 . ?

loop\_

\_geom\_angle\_atom\_site\_label\_1

\_geom\_angle\_atom\_site\_label\_2  
\_geom\_angle\_atom\_site\_label\_3  
\_geom\_angle  
\_geom\_angle\_site\_symmetry\_1  
\_geom\_angle\_site\_symmetry\_3  
\_geom\_angle\_publ\_flag  
O2 S1 O3 118.78(11) .. ?  
O2 S1 N2 104.17(10) .. ?  
O3 S1 N2 111.73(10) .. ?  
O2 S1 C15 108.12(11) .. ?  
O3 S1 C15 107.28(10) .. ?  
N2 S1 C15 106.06(10) .. ?  
C19 S2 C18 90.71(13) .. ?  
C11 N1 C12 127.3(2) .. ?  
C11 N1 H1 114.3(14) .. ?  
C12 N1 H1 118.3(14) .. ?  
C18 N2 S1 121.50(16) .. ?  
C18 N3 C20 115.5(2) .. ?  
C18 N3 H3A 121.7(16) .. ?  
C20 N3 H3A 122.8(16) .. ?  
O1 C1 C2 118.8(2) .. ?  
O1 C1 C10 122.8(2) .. ?  
C2 C1 C10 118.4(2) .. ?  
C3 C2 C1 121.7(2) .. ?  
C3 C2 H2 119.2 .. ?  
C1 C2 H2 119.2 .. ?  
C2 C3 C4 122.3(2) .. ?  
C2 C3 H3 118.9 .. ?  
C4 C3 H3 118.9 .. ?  
C5 C4 C9 119.8(2) .. ?  
C5 C4 C3 121.2(2) .. ?  
C9 C4 C3 119.0(2) .. ?  
C6 C5 C4 121.0(2) .. ?

C6 C5 H5 119.5 . . ?  
C4 C5 H5 119.5 . . ?  
C5 C6 C7 119.4(2) . . ?  
C5 C6 H6 120.3 . . ?  
C7 C6 H6 120.3 . . ?  
C8 C7 C6 121.0(2) . . ?  
C8 C7 H7 119.5 . . ?  
C6 C7 H7 119.5 . . ?  
C7 C8 C9 121.5(2) . . ?  
C7 C8 H8 119.3 . . ?  
C9 C8 H8 119.3 . . ?  
C8 C9 C4 117.4(2) . . ?  
C8 C9 C10 123.51(19) . . ?  
C4 C9 C10 119.1(2) . . ?  
C11 C10 C1 118.8(2) . . ?  
C11 C10 C9 121.6(2) . . ?  
C1 C10 C9 119.55(19) . . ?  
N1 C11 C10 122.8(2) . . ?  
N1 C11 H11 118.6 . . ?  
C10 C11 H11 118.6 . . ?  
C17 C12 C13 119.3(2) . . ?  
C17 C12 N1 116.8(2) . . ?  
C13 C12 N1 123.8(2) . . ?  
C14 C13 C12 119.8(2) . . ?  
C14 C13 H13 120.1 . . ?  
C12 C13 H13 120.1 . . ?  
C15 C14 C13 120.6(2) . . ?  
C15 C14 H14 119.7 . . ?  
C13 C14 H14 119.7 . . ?  
C14 C15 C16 119.9(2) . . ?  
C14 C15 S1 119.37(17) . . ?  
C16 C15 S1 120.70(18) . . ?  
C15 C16 C17 119.3(2) . . ?

C15 C16 H16 120.3 . . ?  
C17 C16 H16 120.3 . . ?  
C12 C17 C16 121.0(2) . . ?  
C12 C17 H17 119.5 . . ?  
C16 C17 H17 119.5 . . ?  
N2 C18 N3 119.9(2) . . ?  
N2 C18 S2 130.88(18) . . ?  
N3 C18 S2 109.21(18) . . ?  
C20 C19 S2 112.0(2) . . ?  
C20 C19 H19 124.0 . . ?  
S2 C19 H19 124.0 . . ?  
C19 C20 N3 112.5(2) . . ?  
C19 C20 H20 123.7 . . ?  
N3 C20 H20 123.7 . . ?

loop\_

\_geom\_torsion\_atom\_site\_label\_1  
\_geom\_torsion\_atom\_site\_label\_2  
\_geom\_torsion\_atom\_site\_label\_3  
\_geom\_torsion\_atom\_site\_label\_4  
\_geom\_torsion  
\_geom\_torsion\_site\_symmetry\_1  
\_geom\_torsion\_site\_symmetry\_2  
\_geom\_torsion\_site\_symmetry\_3  
\_geom\_torsion\_site\_symmetry\_4  
\_geom\_torsion\_publ\_flag  
O2 S1 N2 C18 -165.13(17) . . . . ?  
O3 S1 N2 C18 -35.7(2) . . . . ?  
C15 S1 N2 C18 80.88(19) . . . . ?  
O1 C1 C2 C3 179.8(2) . . . . ?  
C10 C1 C2 C3 -0.4(4) . . . . ?  
C1 C2 C3 C4 0.5(4) . . . . ?  
C2 C3 C4 C5 178.1(3) . . . . ?



C2 C3 C4 C9 0.5(4) . . . . ?  
C9 C4 C5 C6 0.1(4) . . . . ?  
C3 C4 C5 C6 -177.5(3) . . . . ?  
C4 C5 C6 C7 0.5(4) . . . . ?  
C5 C6 C7 C8 -0.6(4) . . . . ?  
C6 C7 C8 C9 0.1(4) . . . . ?  
C7 C8 C9 C4 0.5(4) . . . . ?  
C7 C8 C9 C10 178.8(2) . . . . ?  
C5 C4 C9 C8 -0.6(3) . . . . ?  
C3 C4 C9 C8 177.1(2) . . . . ?  
C5 C4 C9 C10 -179.0(2) . . . . ?  
C3 C4 C9 C10 -1.4(3) . . . . ?  
O1 C1 C10 C11 -0.9(3) . . . . ?  
C2 C1 C10 C11 179.3(2) . . . . ?  
O1 C1 C10 C9 179.3(2) . . . . ?  
C2 C1 C10 C9 -0.5(3) . . . . ?  
C8 C9 C10 C11 3.3(3) . . . . ?  
C4 C9 C10 C11 -178.4(2) . . . . ?  
C8 C9 C10 C1 -176.9(2) . . . . ?  
C4 C9 C10 C1 1.4(3) . . . . ?  
C12 N1 C11 C10 -179.7(2) . . . . ?  
C1 C10 C11 N1 2.2(3) . . . . ?  
C9 C10 C11 N1 -178.0(2) . . . . ?  
C11 N1 C12 C17 -179.6(2) . . . . ?  
C11 N1 C12 C13 0.6(4) . . . . ?  
C17 C12 C13 C14 0.5(4) . . . . ?  
N1 C12 C13 C14 -179.7(2) . . . . ?  
C12 C13 C14 C15 -0.7(4) . . . . ?  
C13 C14 C15 C16 1.0(4) . . . . ?  
C13 C14 C15 S1 179.64(19) . . . . ?  
O2 S1 C15 C14 -40.8(2) . . . . ?  
O3 S1 C15 C14 -169.98(18) . . . . ?  
N2 S1 C15 C14 70.5(2) . . . . ?

O2 S1 C15 C16 137.92(19) . . . . ?  
 O3 S1 C15 C16 8.7(2) . . . . ?  
 N2 S1 C15 C16 -110.84(19) . . . . ?  
 C14 C15 C16 C17 -0.9(3) . . . . ?  
 S1 C15 C16 C17 -179.56(18) . . . . ?  
 C13 C12 C17 C16 -0.4(3) . . . . ?  
 N1 C12 C17 C16 179.7(2) . . . . ?  
 C15 C16 C17 C12 0.6(3) . . . . ?  
 S1 N2 C18 N3 178.04(16) . . . . ?  
 S1 N2 C18 S2 -0.2(3) . . . . ?  
 C20 N3 C18 N2 180.0(2) . . . . ?  
 C20 N3 C18 S2 -1.4(3) . . . . ?  
 C19 S2 C18 N2 179.9(2) . . . . ?  
 C19 S2 C18 N3 1.55(18) . . . . ?  
 C18 S2 C19 C20 -1.4(2) . . . . ?  
 S2 C19 C20 N3 0.9(3) . . . . ?  
 C18 N3 C20 C19 0.3(3) . . . . ?

loop\_

\_geom\_hbond\_atom\_site\_label\_D

\_geom\_hbond\_atom\_site\_label\_H

\_geom\_hbond\_atom\_site\_label\_A

\_geom\_hbond\_distance\_DH

\_geom\_hbond\_distance\_HA

\_geom\_hbond\_distance\_DA

\_geom\_hbond\_angle\_DHA

\_geom\_hbond\_site\_symmetry\_A

\_geom\_hbond\_publ\_flag

N1 H1 O1 0.98(2) 1.72(2) 2.530(3) 138(2) . yes  
 N3 H3A S1 0.89(2) 2.89(3) 3.746(2) 163(2) 3\_666 yes  
 N3 H3A O2 0.89(2) 2.50(2) 3.185(3) 134(2) 3\_666 yes  
 N3 H3A N2 0.89(2) 2.07(2) 2.922(3) 161(2) 3\_666 yes  
 C11 H11 O3 0.93 2.64 3.521(3) 157.4 2\_655 yes

C13 H13 O3 0.93 2.58 3.463(3) 158.7 2\_655 yes

\_refine\_diff\_density\_max 0.260

\_refine\_diff\_density\_min -0.271

\_refine\_diff\_density\_rms 0.043

\_shelx\_res\_file

;

TITL NAPSULY\_0m in P2(1)/c RED PRISM

shelx.res

created by SHELXL-2019/2 at 12:42:26 on 18-Feb-2023

CELL 0.71073 7.8389 13.8151 17.1980 90.000 94.032 90.000

ZERR 4.00 0.0008 0.0016 0.0021 0.000 0.004 0.000

LATT 1

SYMM -x, y+1/2, -z+1/2

SFAC C H N O S

UNIT 80 60 12 12 8

OMIT -3 54

L.S. 40

ACTA

BOND \$H

FMAP 2

PLAN 10

CONF

HTAB

TEMP 23.000

SIZE 0.32 0.28 0.23

HTAB N1 O1

EQIV \$1 -x+1, -y+1, -z+1

HTAB N3 S1\_\$1

HTAB N3 O2\_\$1

HTAB N3 N2\_\$1

EQIV \$2 -x+1, y+1/2, -z+1/2

HTAB C11 O3\_\$2

HTAB C13 O3\_\$2

OMIT 0 1 1

MPLA 6 N2 C18 C19 C20 S2 N3

MPLA 12 C1 C2 C3 C4 C5 C6 C7 C8 C9 C10 C11 O1

MPLA 7 N1 C12 C13 C14 C15 C16 C17

MPLA 3 S1 O2 O3

MPLA 6 N2 C18 C19 C20 S2 N3

MPLA 7 N1 C12 C13 C14 C15 C16 C17

MPLA 10 C12 C13 C14 C15 C16 C17 S1 O2 O3 N2

MPLA 5 C18 C19 C20 S2 N3

WGHT 0.042900 0.313200

FVAR 0.09598

S1 5 0.628057 0.373793 0.359833 11.00000 0.06087 0.04754 =  
0.03397 0.00184 0.00113 0.00970

S2 5 0.270187 0.276639 0.412422 11.00000 0.07069 0.05016 =  
0.06133 -0.01180 0.00315 -0.01084

O1 4 0.121683 0.415423 -0.065008 11.00000 0.08385 0.04670 =  
0.07113 -0.00012 -0.00997 0.00069

O2 4 0.788859 0.422998 0.369546 11.00000 0.05088 0.08175 =  
0.04944 0.00204 0.00020 0.00012

O3 4 0.625926 0.270120 0.364266 11.00000 0.09287 0.04482 =  
0.04200 0.00183 0.00191 0.02066

N1 3 0.300087 0.481441 0.051420 11.00000 0.05439 0.05107 =  
0.03935 0.00374 -0.00274 0.00327

H1 2 0.238428 0.429667 0.022870 11.00000 -1.20000

N2 3 0.515331 0.422184 0.423883 11.00000 0.06085 0.03769 =  
0.03636 -0.00150 0.00791 -0.00083

N3 3 0.283740 0.422420 0.499368 11.00000 0.06113 0.04441 =  
0.04787 -0.00396 0.01028 -0.00303

H3A 2 0.321545 0.474981 0.524945 11.00000 -1.20000

C1 1 0.123148 0.499229 -0.095202 11.00000 0.05042 0.05084 =

0.05121 -0.00314 0.00113 0.00818

C2 1 0.036279 0.514085 -0.170260 11.00000 0.05739 0.06149 =  
0.05134 -0.01130 -0.00670 -0.00432

AFIX 43

H2 2 -0.019101 0.462165 -0.195502 11.00000 -1.20000

AFIX 0

C3 1 0.032738 0.600287 -0.204843 11.00000 0.05419 0.07498 =  
0.03926 -0.00359 -0.00714 -0.00005

AFIX 43

H3 2 -0.025917 0.606851 -0.253469 11.00000 -1.20000

AFIX 0

C4 1 0.116162 0.683350 -0.169763 11.00000 0.04839 0.05775 =  
0.03686 0.00069 -0.00107 0.00162

C5 1 0.114817 0.772307 -0.208268 11.00000 0.07536 0.07401 =  
0.04361 0.01547 -0.01344 -0.00161

AFIX 43

H5 2 0.055085 0.778511 -0.256678 11.00000 -1.20000

AFIX 0

C6 1 0.199669 0.850179 -0.176016 11.00000 0.09102 0.06040 =  
0.05615 0.02085 -0.01190 -0.00611

AFIX 43

H6 2 0.197231 0.909269 -0.201978 11.00000 -1.20000

AFIX 0

C7 1 0.289205 0.840560 -0.104515 11.00000 0.08374 0.05122 =  
0.05233 0.00275 -0.00733 -0.00587

AFIX 43

H7 2 0.348124 0.893463 -0.082612 11.00000 -1.20000

AFIX 0

C8 1 0.292632 0.754694 -0.065476 11.00000 0.06816 0.05254 =  
0.03611 -0.00046 -0.00834 0.00051

AFIX 43

H8 2 0.353845 0.750163 -0.017294 11.00000 -1.20000

AFIX 0

C9 1 0.206431 0.673458 -0.096136 11.00000 0.04371 0.04969 =  
0.03400 -0.00011 0.00425 0.00660

C10 1 0.208811 0.579934 -0.057408 11.00000 0.04164 0.05011 =  
0.03465 -0.00191 0.00207 0.00546

C11 1 0.291866 0.566535 0.015789 11.00000 0.04949 0.04829 =  
0.04010 -0.00015 0.00315 0.00327

AFIX 43

H11 2 0.343968 0.619554 0.040893 11.00000 -1.20000

AFIX 0

C12 1 0.379533 0.460351 0.125034 11.00000 0.04356 0.04903 =  
0.03774 0.00568 0.00510 0.00730

C13 1 0.462201 0.528157 0.172658 11.00000 0.07304 0.04085 =  
0.04574 0.00979 -0.00401 -0.00278

AFIX 43

H13 2 0.467179 0.592349 0.156691 11.00000 -1.20000

AFIX 0

C14 1 0.537379 0.500798 0.243863 11.00000 0.07131 0.04609 =  
0.04386 0.00120 -0.00593 -0.00302

AFIX 43

H14 2 0.594324 0.546593 0.275698 11.00000 -1.20000

AFIX 0

C15 1 0.529174 0.406454 0.268431 11.00000 0.04883 0.04457 =  
0.03357 0.00105 0.00473 0.00795

C16 1 0.447293 0.338205 0.221093 11.00000 0.06591 0.03984 =  
0.04224 0.00310 0.00184 0.00558

AFIX 43

H16 2 0.442650 0.274010 0.237083 11.00000 -1.20000

AFIX 0

C17 1 0.372273 0.365881 0.149795 11.00000 0.05983 0.04701 =  
0.04239 -0.00511 -0.00319 0.00163

AFIX 43

H17 2 0.315809 0.319999 0.117875 11.00000 -1.20000

AFIX 0

C18 1 0.371849 0.381591 0.444147 11.00000 0.05738 0.03751 =  
0.03402 0.00235 -0.00002 0.00302

C19 1 0.110644 0.296188 0.474215 11.00000 0.05894 0.06214 =  
0.08122 -0.00098 0.00802 -0.01077

AFIX 43

H19 2 0.016556 0.255785 0.477583 11.00000 -1.20000

AFIX 0

C20 1 0.137298 0.375007 0.516166 11.00000 0.06147 0.06202 =  
0.06277 0.00052 0.01600 0.00118

AFIX 43

H20 2 0.064756 0.396229 0.553157 11.00000 -1.20000

AFIX 0

HKLF 4 1 1 0 0 0 1 0 0 0 1

REM NAPSULY\_0m in P2(1)/c RED PRISM

REM wR2 = 0.1087, GooF = S = 1.018, Restrained GooF = 1.018 for all data

REM R1 = 0.0437 for 2548 Fo > 4sig(Fo) and 0.0852 for all 4040 data

REM 259 parameters refined using 0 restraints

END

### CIF of ACPIN without hkl data

data\_global

#=====

# PROCESSING SUMMARY (IUCr Office Use only)

\_publ\_contact\_author

;

Muhammad Nawaz Tahir  
University of Sargodha  
Department of Physics  
Sargodha  
Pakistan

;

\_publ\_contact\_author\_phone '0092 48 92 30 914'  
\_publ\_contact\_author\_fax '0092 48 32 22 121'  
\_publ\_contact\_author\_email 'dmntahir\_uos@yahoo.com'  
\_publ\_requested\_journal ""  
\_journal\_date\_recd\_electronic ?

\_journal\_date\_to\_coeditor ?  
\_journal\_date\_from\_coeditor ?  
\_journal\_date\_accepted ?

\_journal\_date\_printers\_first ?  
\_journal\_date\_printers\_final ?  
\_journal\_date\_proofs\_out ?  
\_journal\_date\_proofs\_in ?

\_journal\_coeditor\_name ?  
\_journal\_coeditor\_code ?  
\_journal\_paper\_category ?  
\_journal\_coeditor\_notes

;

;

\_journal\_techeditor\_code ?  
\_iucr\_compatibility\_tag ?  
\_journal\_techeditor\_notes

;

;



\_journal\_coden\_ASTM ?  
\_journal\_name\_full ?  
\_journal\_year ?  
\_journal\_volume ?  
\_journal\_issue ?  
\_journal\_page\_first ?  
\_journal\_page\_last ?

\_journal\_suppl\_publ\_number ?  
\_journal\_suppl\_publ\_pages ?

#=====

loop\_  
\_publ\_author\_name  
\_publ\_author\_address

'Muhammad Ashfaq'  
;  
Department of Physics  
University of Sargodha  
Sargodha  
Pakistan  
orcid id: 0000-0001-6663-8777  
;

'Muhammad Nawaz Tahir'  
;  
Department of Physics  
University of Sargodha  
Sargodha  
Pakistan  
orcid id: 0000-0002-6815-9806

;

'Akbar Ali'

;

Department of Chemistry,  
Government College University  
Faisalabad,  
Pakistan.

;

'Abida Naseem Malik'

;

Department of Physics  
University of Sargodha  
Sargodha  
Pakistan

;

'Aleksey Kuznetsov'

;

Departamento de Quimica,  
Campus Santiago Vitacura,  
Universidad Tecnica Federico Santa Maria,  
Av. Santa Maria 6400 Vitacura,  
Postal code: 7660251,  
Chile

;

\_audit\_creation\_date ?

\_audit\_creation\_method ?

#=====

# TEXT

\_publ\_section\_title

;

(E)-1-(((4-amino-5-(4-chlorophenyl)-6-ethylpyrimidin-2-yl)iminio)methyl)

naphthalen-2-olate

;

\_publ\_section\_abstract

;

;

\_publ\_section\_comment

;

;

\_publ\_section\_exptl\_refinement

;

;

\_publ\_section\_exptl\_prep

;

;

\_publ\_section\_related\_literature

;

;

\_publ\_section\_references

;

Bruker (2007). <i>SADABS</i>. Bruker AXS Inc., Madison, Wisconsin, USA.

Bruker (2007). <i>APEX2</i> and <i>SAINT</i>. Bruker AXS Inc.,  
Madison, Wisconsin, USA.

Farrugia, L. J. (1997). *J. Appl. Cryst.* **30**, 565.

Farrugia, L. J. (2012). *J. Appl. Cryst.* **45**, 849--854.

Sheldrick, G. M. (2008). *Acta Cryst.* **A64**, 112--122.

Sheldrick, G. M. (2015). *Acta Cryst.* **C71**, 3--8.

Spek, A. L. (2009). *Acta Cryst.* **D65**, 148--155.

;

\_publ\_section\_figure\_captions

;

;

\_publ\_section\_acknowledgements

;

;

data\_pymtvan\_twnew

\_audit\_creation\_method 'SHELXL-2019/2'

\_shelx\_SHELXL\_version\_number '2019/2'

\_chemical\_name\_common ?

\_chemical\_absolute\_configuration '.'

\_chemical\_name\_systematic

;

(E)-1-(((4-amino-5-(4-chlorophenyl)-6-ethylpyrimidin-2-yl)iminio)methyl)

naphthalen-2-olate

;

\_chemical\_formula\_moiety 'C23 H19 Cl N4 O'

\_chemical\_formula\_sum 'C23 H19 Cl N4 O'

```
_chemical_formula_iupac  'C23 H19 Cl N4 O'
_chemical_formula_weight      402.87
```

```
loop_
```

```
_atom_type_symbol
```

```
_atom_type_description
```

```
_atom_type_scatter_dispersion_real
```

```
_atom_type_scatter_dispersion_imag
```

```
_atom_type_scatter_source
```

```
'C' 'C' 0.0033 0.0016
```

```
'International Tables Vol C Tables 4.2.6.8 and 6.1.1.4'
```

```
'H' 'H' 0.0000 0.0000
```

```
'International Tables Vol C Tables 4.2.6.8 and 6.1.1.4'
```

```
'N' 'N' 0.0061 0.0033
```

```
'International Tables Vol C Tables 4.2.6.8 and 6.1.1.4'
```

```
'O' 'O' 0.0106 0.0060
```

```
'International Tables Vol C Tables 4.2.6.8 and 6.1.1.4'
```

```
'Cl' 'Cl' 0.1484 0.1585
```

```
'International Tables Vol C Tables 4.2.6.8 and 6.1.1.4'
```

```
_space_group_crystal_system  triclinic
```

```
_space_group_IT_number      2
```

```
_space_group_name_H-M_alt    'P -1'
```

```
_space_group_name_Hall      '-P 1'
```

```
_shelx_space_group_comment
```

```
;
```

The symmetry employed for this shelxl refinement is uniquely defined by the following loop, which should always be used as a source of symmetry information in preference to the above space-group names.

They are only intended as comments.

```
;
```

```
loop_
  _space_group_symop_operation_xyz
  'x, y, z'
  '-x, -y, -z'

  _cell_length_a          4.5436(6)
  _cell_length_b          12.5255(16)
  _cell_length_c          17.673(2)
  _cell_angle_alpha       88.308(8)
  _cell_angle_beta        89.195(8)
  _cell_angle_gamma       82.611(9)
  _cell_volume            996.9(2)
  _cell_formula_units_Z   2
  _cell_measurement_reflns_used    2397
  _cell_measurement_theta_min      1.640
  _cell_measurement_theta_max      27.448
  _cell_measurement_temperature    296(2)
  _exptl_crystal_description  needle
  _exptl_crystal_colour       'yellow'
  _exptl_crystal_size_max      0.42
  _exptl_crystal_size_mid      0.24
  _exptl_crystal_size_min      0.20
  _exptl_crystal_density_diffn    1.324
  _exptl_crystal_density_meas     ?
  _exptl_crystal_density_method   'not measured'
  _exptl_crystal_F_000          420
  _exptl_absorpt_coefficient_mu    0.214
  _exptl_absorpt_correction_type   multi-scan
  _exptl_absorpt_process_details   '(SADABS; Bruker, 2007)'
  _exptl_absorpt_correction_T_min  0.869
  _exptl_absorpt_correction_T_max  0.894
  _exptl_special_details

;
```

;

\_diffraction\_ambient\_temperature 296(2)  
\_diffraction\_radiation\_type MoK\alpha  
\_diffraction\_radiation\_wavelength 0.71073  
\_diffraction\_radiation\_source 'fine-focus sealed tube'  
\_diffraction\_radiation\_monochromator graphite  
\_diffraction\_measurement\_device\_type 'Bruker Kappa APEXII CCD'  
\_diffraction\_measurement\_method \w  
\_diffraction\_detector\_area\_resol\_mean 7.710  
\_diffraction\_reflns\_number 4351  
\_diffraction\_reflns\_av\_unetl/netl 0.0554  
\_diffraction\_reflns\_av\_R\_equivalents ?  
\_diffraction\_reflns\_limit\_h\_min -5  
\_diffraction\_reflns\_limit\_h\_max 5  
\_diffraction\_reflns\_limit\_k\_min -16  
\_diffraction\_reflns\_limit\_k\_max 16  
\_diffraction\_reflns\_limit\_l\_min -1  
\_diffraction\_reflns\_limit\_l\_max 22  
\_diffraction\_reflns\_theta\_min 1.640  
\_diffraction\_reflns\_theta\_max 27.448  
\_diffraction\_reflns\_theta\_full 25.242  
\_diffraction\_measured\_fraction\_theta\_max 0.958  
\_diffraction\_measured\_fraction\_theta\_full 0.966  
\_diffraction\_reflns\_Laue\_measured\_fraction\_max 0.958  
\_diffraction\_reflns\_Laue\_measured\_fraction\_full 0.966  
\_diffraction\_reflns\_point\_group\_measured\_fraction\_max 0.958  
\_diffraction\_reflns\_point\_group\_measured\_fraction\_full 0.966  
\_diffraction\_standards\_number 0  
\_diffraction\_standards\_interval\_count ?  
\_diffraction\_standards\_interval\_time ?  
\_diffraction\_standards\_decay\_% ?

\_refine\_special\_details

;

Refinement of  $\langle F \rangle^2$  against ALL reflections. The weighted  $\langle R \rangle$ -factor  $\langle wR \rangle$  and goodness of fit  $\langle S \rangle$  are based on  $\langle F \rangle^2$ , conventional  $\langle R \rangle$ -factors  $\langle R \rangle$  are based on  $\langle F \rangle$ , with  $\langle F \rangle$  set to zero for negative  $\langle F \rangle^2$ . The threshold expression of  $\langle F \rangle^2 > \sqrt{\langle F \rangle^2}$  is used only for calculating  $\langle R \rangle$ -factors(gt) etc. and is not relevant to the choice of reflections for refinement.

$\langle R \rangle$ -factors based on  $\langle F \rangle^2$  are statistically about twice as large as those based on  $\langle F \rangle$ , and  $\langle R \rangle$ -factors based on ALL data will be even larger.

;

\_reflns\_number\_total 4351  
 \_reflns\_number\_gt 2397  
 \_reflns\_threshold\_expression  $l > 2 \sqrt{l}$   
 \_refine\_ls\_structure\_factor\_coef Fsqd  
 \_refine\_ls\_matrix\_type full  
 \_refine\_ls\_R\_factor\_all 0.1311  
 \_refine\_ls\_R\_factor\_gt 0.0763  
 \_refine\_ls\_wR\_factor\_ref 0.2358  
 \_refine\_ls\_wR\_factor\_gt 0.2131  
 \_refine\_ls\_goodness\_of\_fit\_ref 1.139  
 \_refine\_ls\_restrained\_S\_all 1.139  
 \_refine\_ls\_number\_reflns 4351  
 \_refine\_ls\_number\_parameters 264  
 \_refine\_ls\_number\_restraints 0  
 \_refine\_ls\_extinction\_method none  
 \_refine\_ls\_extinction\_coef .  
 \_refine\_ls\_hydrogen\_treatment constr  
 \_refine\_ls\_weighting\_scheme calc  
 \_refine\_ls\_weighting\_details

'w=1/[\(\langle F \rangle^2 + (0.0757P)^2 + 0.7915P\)] where  $P = (F_o^2 + 2F_c^2)/3$ '



```
_atom_sites_solution_hydrogens geom
_atom_sites_solution_primary direct
_atom_sites_solution_secondary difmap
_refine_ls_shift/su_max 0.000
_refine_ls_shift/su_mean 0.000
_computing_data_collection 'APEX2 (Bruker, 2007)'
_computing_cell_refinement 'SAINT (Bruker, 2007)'
_computing_data_reduction 'SAINT (Bruker, 2007)'
_computing_structure_solution 'SHELXT2014 (Sheldrick, 2008)'
_computing_structure_refinement 'SHELXL-2019/2 (Sheldrick, 2015)'
_computing_molecular_graphics
'ORTEP-3 for Windows (Farrugia, 2012) and PLATON (Spek, 2009)'
_computing_publication_material
;
WinGX (Farrugia, 2012) and PLATON (Spek, 2009)
;
```

```
loop_
_atom_site_label
_atom_site_type_symbol
_atom_site_fract_x
_atom_site_fract_y
_atom_site_fract_z
_atom_site_U_iso_or_equiv
_atom_site_adp_type
_atom_site_occupancy
_atom_site_site_symmetry_order
_atom_site_calc_flag
_atom_site_refinement_flags_posn
_atom_site_refinement_flags_adp
_atom_site_refinement_flags_occupancy
_atom_site_disorder_assembly
```

\_atom\_site\_disorder\_group

Cl1 Cl 0.8437(5) 0.66072(16) -0.44259(7) 0.1244(8) Uani 1 1 d . . . . .  
O1 O 1.5052(8) 0.6311(2) 0.22359(17) 0.0647(9) Uani 1 1 d . . . . .  
N1 N 1.1691(8) 0.7121(2) 0.11607(17) 0.0506(9) Uani 1 1 d . . . . .  
H1 H 1.316681 0.667310 0.131723 0.061 Uiso 1 1 calc R U . . .  
N2 N 1.2336(8) 0.6206(3) 0.00662(17) 0.0515(9) Uani 1 1 d . . . . .  
N3 N 1.3058(9) 0.5222(3) -0.09936(18) 0.0620(10) Uani 1 1 d . . . . .  
H3A H 1.422638 0.476107 -0.073272 0.074 Uiso 1 1 calc R U . . .  
H3B H 1.275403 0.511139 -0.146252 0.074 Uiso 1 1 calc R U . . .  
N4 N 0.8944(8) 0.7821(2) 0.01133(18) 0.0490(8) Uani 1 1 d . . . . .  
C1 C 1.3595(10) 0.6975(3) 0.2669(2) 0.0519(10) Uani 1 1 d . . . . .  
C2 C 1.4275(11) 0.6933(4) 0.3474(2) 0.0606(12) Uani 1 1 d . . . . .  
H2 H 1.576803 0.641685 0.365800 0.073 Uiso 1 1 calc R U . . .  
C3 C 1.2799(11) 0.7618(4) 0.3950(2) 0.0606(12) Uani 1 1 d . . . . .  
H3 H 1.330356 0.756311 0.445923 0.073 Uiso 1 1 calc R U . . .  
C4 C 1.0470(10) 0.8437(3) 0.3713(2) 0.0530(11) Uani 1 1 d . . . . .  
C5 C 0.8982(12) 0.9153(4) 0.4231(2) 0.0629(13) Uani 1 1 d . . . . .  
H5 H 0.948896 0.908272 0.473926 0.075 Uiso 1 1 calc R U . . .  
C6 C 0.6814(12) 0.9948(4) 0.4005(3) 0.0683(13) Uani 1 1 d . . . . .  
H6 H 0.587866 1.042410 0.435310 0.082 Uiso 1 1 calc R U . . .  
C7 C 0.6019(11) 1.0036(4) 0.3247(2) 0.0625(12) Uani 1 1 d . . . . .  
H7 H 0.451165 1.056642 0.308993 0.075 Uiso 1 1 calc R U . . .  
C8 C 0.7432(10) 0.9353(3) 0.2731(2) 0.0554(11) Uani 1 1 d . . . . .  
H8 H 0.687906 0.943491 0.222608 0.067 Uiso 1 1 calc R U . . .  
C9 C 0.9688(10) 0.8531(3) 0.2940(2) 0.0455(9) Uani 1 1 d . . . . .  
C10 C 1.1248(9) 0.7779(3) 0.2408(2) 0.0441(9) Uani 1 1 d . . . . .  
C11 C 1.0389(10) 0.7792(3) 0.1662(2) 0.0479(10) Uani 1 1 d . . . . .  
H11 H 0.881995 0.829698 0.150473 0.057 Uiso 1 1 calc R U . . .  
C12 C 1.0917(10) 0.7062(3) 0.0402(2) 0.0459(9) Uani 1 1 d . . . . .  
C13 C 1.1704(10) 0.6115(3) -0.0668(2) 0.0488(10) Uani 1 1 d . . . . .  
C14 C 0.9780(9) 0.6917(3) -0.1065(2) 0.0434(9) Uani 1 1 d . . . . .  
C15 C 0.8397(9) 0.7750(3) -0.0636(2) 0.0448(9) Uani 1 1 d . . . . .  
C16 C 0.6198(10) 0.8645(3) -0.0940(2) 0.0551(11) Uani 1 1 d . . . . .

H16A H 0.438920 0.867660 -0.063915 0.066 Uiso 1 1 calc R U . . .  
H16B H 0.571511 0.848972 -0.145513 0.066 Uiso 1 1 calc R U . . .  
C17 C 0.7319(12) 0.9725(3) -0.0936(3) 0.0760(15) Uani 1 1 d . . . . .  
H17A H 0.808426 0.983545 -0.044450 0.114 Uiso 1 1 calc R U . . .  
H17B H 0.571904 1.028182 -0.105070 0.114 Uiso 1 1 calc R U . . .  
H17C H 0.886726 0.974607 -0.130896 0.114 Uiso 1 1 calc R U . . .  
C18 C 0.9410(9) 0.6853(3) -0.1905(2) 0.0461(9) Uani 1 1 d . . . . .  
C19 C 1.0302(11) 0.7619(3) -0.2399(2) 0.0570(11) Uani 1 1 d . . . . .  
H19 H 1.112091 0.819797 -0.220837 0.068 Uiso 1 1 calc R U . . .  
C20 C 1.0012(12) 0.7551(4) -0.3177(2) 0.0683(13) Uani 1 1 d . . . . .  
H20 H 1.061097 0.807895 -0.350439 0.082 Uiso 1 1 calc R U . . .  
C21 C 0.8825(12) 0.6690(4) -0.3453(2) 0.0665(13) Uani 1 1 d . . . . .  
C22 C 0.7958(13) 0.5910(4) -0.2986(3) 0.0749(15) Uani 1 1 d . . . . .  
H22 H 0.716106 0.532999 -0.318188 0.090 Uiso 1 1 calc R U . . .  
C23 C 0.8277(11) 0.5989(4) -0.2210(2) 0.0635(13) Uani 1 1 d . . . . .  
H23 H 0.771632 0.544828 -0.188875 0.076 Uiso 1 1 calc R U . . .

loop\_

\_atom\_site\_aniso\_label

\_atom\_site\_aniso\_U\_11

\_atom\_site\_aniso\_U\_22

\_atom\_site\_aniso\_U\_33

\_atom\_site\_aniso\_U\_23

\_atom\_site\_aniso\_U\_13

\_atom\_site\_aniso\_U\_12

Cl1 0.189(2) 0.1558(16) 0.0369(7) -0.0017(8) -0.0176(9) -0.0536(14)  
O1 0.076(2) 0.0589(18) 0.0561(19) -0.0029(14) -0.0072(16) 0.0057(16)  
N1 0.066(2) 0.0479(18) 0.0349(17) -0.0006(14) -0.0026(15) 0.0031(16)  
N2 0.070(2) 0.0467(19) 0.0353(17) 0.0002(14) 0.0037(16) 0.0028(17)  
N3 0.086(3) 0.058(2) 0.0346(18) -0.0019(15) 0.0001(17) 0.0190(19)  
N4 0.058(2) 0.0459(18) 0.0418(18) -0.0051(14) -0.0021(15) 0.0005(16)  
C1 0.069(3) 0.049(2) 0.039(2) 0.0005(18) -0.005(2) -0.012(2)  
C2 0.072(3) 0.062(3) 0.047(2) 0.007(2) -0.012(2) -0.004(2)

C3 0.079(3) 0.069(3) 0.036(2) 0.004(2) -0.018(2) -0.020(3)  
C4 0.067(3) 0.058(2) 0.038(2) -0.0038(18) 0.0008(19) -0.024(2)  
C5 0.086(4) 0.074(3) 0.034(2) -0.009(2) 0.001(2) -0.026(3)  
C6 0.082(4) 0.071(3) 0.053(3) -0.019(2) 0.015(2) -0.014(3)  
C7 0.069(3) 0.065(3) 0.051(3) -0.008(2) 0.005(2) -0.002(2)  
C8 0.065(3) 0.061(3) 0.041(2) -0.0016(19) 0.000(2) -0.008(2)  
C9 0.056(3) 0.049(2) 0.0337(19) -0.0009(16) 0.0001(17) -0.0170(19)  
C10 0.055(3) 0.043(2) 0.0352(19) 0.0019(15) -0.0002(17) -0.0104(18)  
C11 0.063(3) 0.040(2) 0.040(2) 0.0009(16) -0.0051(19) -0.0041(18)  
C12 0.061(3) 0.045(2) 0.0326(19) 0.0024(16) -0.0010(17) -0.0079(19)  
C13 0.063(3) 0.046(2) 0.036(2) -0.0004(16) 0.0069(18) -0.0004(19)  
C14 0.051(3) 0.044(2) 0.0357(19) 0.0006(16) -0.0001(17) -0.0093(18)  
C15 0.053(3) 0.047(2) 0.0350(19) -0.0024(16) -0.0052(17) -0.0060(18)  
C16 0.056(3) 0.060(3) 0.046(2) -0.0112(19) -0.0108(19) 0.006(2)  
C17 0.088(4) 0.052(3) 0.085(4) 0.002(2) -0.032(3) 0.007(2)  
C18 0.053(3) 0.045(2) 0.039(2) 0.0001(16) -0.0007(17) -0.0042(18)  
C19 0.073(3) 0.057(3) 0.044(2) 0.0058(19) -0.009(2) -0.016(2)  
C20 0.092(4) 0.069(3) 0.046(2) 0.015(2) -0.004(2) -0.021(3)  
C21 0.084(4) 0.082(3) 0.034(2) -0.003(2) -0.004(2) -0.013(3)  
C22 0.107(5) 0.079(3) 0.045(3) -0.009(2) -0.006(3) -0.035(3)  
C23 0.087(4) 0.063(3) 0.045(2) 0.002(2) 0.004(2) -0.028(2)

\_geom\_special\_details

;

All esds (except the esd in the dihedral angle between two l.s. planes) are estimated using the full covariance matrix. The cell esds are taken into account individually in the estimation of esds in distances, angles and torsion angles; correlations between esds in cell parameters are only used when they are defined by crystal symmetry. An approximate (isotropic) treatment of cell esds is used for estimating esds involving l.s. planes.

;

loop\_

\_geom\_bond\_atom\_site\_label\_1  
\_geom\_bond\_atom\_site\_label\_2  
\_geom\_bond\_distance  
\_geom\_bond\_site\_symmetry\_2  
\_geom\_bond\_publ\_flag  
Cl1 C21 1.739(4) . ?  
O1 C1 1.263(5) . ?  
N1 C11 1.320(5) . ?  
N1 C12 1.397(5) . ?  
N1 H1 0.8600 . ?  
N2 C12 1.330(5) . ?  
N2 C13 1.344(5) . ?  
N3 C13 1.346(5) . ?  
N3 H3A 0.8600 . ?  
N3 H3B 0.8600 . ?  
N4 C12 1.316(5) . ?  
N4 C15 1.358(5) . ?  
C1 C10 1.440(6) . ?  
C1 C2 1.458(5) . ?  
C2 C3 1.332(6) . ?  
C2 H2 0.9300 . ?  
C3 C4 1.433(6) . ?  
C3 H3 0.9300 . ?  
C4 C5 1.404(6) . ?  
C4 C9 1.416(5) . ?  
C5 C6 1.362(7) . ?  
C5 H5 0.9300 . ?  
C6 C7 1.389(6) . ?  
C6 H6 0.9300 . ?  
C7 C8 1.366(6) . ?  
C7 H7 0.9300 . ?  
C8 C9 1.401(6) . ?  
C8 H8 0.9300 . ?

C9 C10 1.461(5) . ?  
C10 C11 1.379(5) . ?  
C11 H11 0.9300 . ?  
C13 C14 1.419(5) . ?  
C14 C15 1.387(5) . ?  
C14 C18 1.501(5) . ?  
C15 C16 1.495(5) . ?  
C16 C17 1.506(6) . ?  
C16 H16A 0.9700 . ?  
C16 H16B 0.9700 . ?  
C17 H17A 0.9600 . ?  
C17 H17B 0.9600 . ?  
C17 H17C 0.9600 . ?  
C18 C19 1.375(5) . ?  
C18 C23 1.383(6) . ?  
C19 C20 1.389(6) . ?  
C19 H19 0.9300 . ?  
C20 C21 1.371(6) . ?  
C20 H20 0.9300 . ?  
C21 C22 1.354(6) . ?  
C22 C23 1.388(6) . ?  
C22 H22 0.9300 . ?  
C23 H23 0.9300 . ?

loop\_

\_geom\_angle\_atom\_site\_label\_1

\_geom\_angle\_atom\_site\_label\_2

\_geom\_angle\_atom\_site\_label\_3

\_geom\_angle

\_geom\_angle\_site\_symmetry\_1

\_geom\_angle\_site\_symmetry\_3

\_geom\_angle\_publ\_flag

C11 N1 C12 126.7(4) . . ?

C11 N1 H1 116.7 .. ?  
C12 N1 H1 116.7 .. ?  
C12 N2 C13 115.6(3) .. ?  
C13 N3 H3A 120.0 .. ?  
C13 N3 H3B 120.0 .. ?  
H3A N3 H3B 120.0 .. ?  
C12 N4 C15 115.8(3) .. ?  
O1 C1 C10 123.1(3) .. ?  
O1 C1 C2 119.3(4) .. ?  
C10 C1 C2 117.6(4) .. ?  
C3 C2 C1 121.3(4) .. ?  
C3 C2 H2 119.3 .. ?  
C1 C2 H2 119.3 .. ?  
C2 C3 C4 123.0(4) .. ?  
C2 C3 H3 118.5 .. ?  
C4 C3 H3 118.5 .. ?  
C5 C4 C9 119.5(4) .. ?  
C5 C4 C3 121.4(4) .. ?  
C9 C4 C3 119.1(4) .. ?  
C6 C5 C4 121.6(4) .. ?  
C6 C5 H5 119.2 .. ?  
C4 C5 H5 119.2 .. ?  
C5 C6 C7 119.1(4) .. ?  
C5 C6 H6 120.5 .. ?  
C7 C6 H6 120.5 .. ?  
C8 C7 C6 120.6(5) .. ?  
C8 C7 H7 119.7 .. ?  
C6 C7 H7 119.7 .. ?  
C7 C8 C9 122.0(4) .. ?  
C7 C8 H8 119.0 .. ?  
C9 C8 H8 119.0 .. ?  
C8 C9 C4 117.2(4) .. ?  
C8 C9 C10 123.9(3) .. ?

C4 C9 C10 119.0(4) . . ?  
C11 C10 C1 119.3(4) . . ?  
C11 C10 C9 120.5(4) . . ?  
C1 C10 C9 120.1(3) . . ?  
N1 C11 C10 123.0(4) . . ?  
N1 C11 H11 118.5 . . ?  
C10 C11 H11 118.5 . . ?  
N4 C12 N2 128.5(3) . . ?  
N4 C12 N1 118.6(3) . . ?  
N2 C12 N1 113.0(3) . . ?  
N2 C13 N3 115.0(4) . . ?  
N2 C13 C14 121.8(3) . . ?  
N3 C13 C14 123.2(3) . . ?  
C15 C14 C13 116.1(3) . . ?  
C15 C14 C18 123.7(3) . . ?  
C13 C14 C18 120.2(3) . . ?  
N4 C15 C14 122.1(4) . . ?  
N4 C15 C16 113.6(3) . . ?  
C14 C15 C16 124.3(3) . . ?  
C15 C16 C17 113.0(4) . . ?  
C15 C16 H16A 109.0 . . ?  
C17 C16 H16A 109.0 . . ?  
C15 C16 H16B 109.0 . . ?  
C17 C16 H16B 109.0 . . ?  
H16A C16 H16B 107.8 . . ?  
C16 C17 H17A 109.5 . . ?  
C16 C17 H17B 109.5 . . ?  
H17A C17 H17B 109.5 . . ?  
C16 C17 H17C 109.5 . . ?  
H17A C17 H17C 109.5 . . ?  
H17B C17 H17C 109.5 . . ?  
C19 C18 C23 117.5(4) . . ?  
C19 C18 C14 121.6(4) . . ?



C23 C18 C14 120.8(3) . . ?  
 C18 C19 C20 121.7(4) . . ?  
 C18 C19 H19 119.2 . . ?  
 C20 C19 H19 119.2 . . ?  
 C21 C20 C19 118.7(4) . . ?  
 C21 C20 H20 120.7 . . ?  
 C19 C20 H20 120.7 . . ?  
 C22 C21 C20 121.5(4) . . ?  
 C22 C21 Cl1 119.7(4) . . ?  
 C20 C21 Cl1 118.8(4) . . ?  
 C21 C22 C23 119.0(4) . . ?  
 C21 C22 H22 120.5 . . ?  
 C23 C22 H22 120.5 . . ?  
 C18 C23 C22 121.6(4) . . ?  
 C18 C23 H23 119.2 . . ?  
 C22 C23 H23 119.2 . . ?

loop\_

\_geom\_hbond\_atom\_site\_label\_D  
 \_geom\_hbond\_atom\_site\_label\_H  
 \_geom\_hbond\_atom\_site\_label\_A  
 \_geom\_hbond\_distance\_DH  
 \_geom\_hbond\_distance\_HA  
 \_geom\_hbond\_distance\_DA  
 \_geom\_hbond\_angle\_DHA  
 \_geom\_hbond\_site\_symmetry\_A  
 \_geom\_hbond\_publ\_flag  
 N1 H1 O1 0.86 1.86 2.557(4) 136.6 . yes  
 N3 H3A N2 0.86 2.19 3.037(5) 170.8 2\_865 yes  
 N3 H3B O1 0.86 2.38 3.003(5) 129.2 2\_865 yes  
  
 \_refine\_diff\_density\_max 0.317  
 \_refine\_diff\_density\_min -0.275

\_refine\_diff\_density\_rms 0.079

\_shelx\_res\_file

;

TITL PYMTVAN\_0m in P-1 YELLOW NEEDLE

shelx.res

created by SHELXL-2019/2 at 14:15:37 on 18-Feb-2023

CELL 0.71073 4.5436 12.5255 17.6725 88.308 89.195 82.611

ZERR 2.00 0.0006 0.0016 0.0022 0.008 0.008 0.009

LATT 1

SFAC C H N O Cl

UNIT 46 38 8 2 2

L.S. 20

ACTA

LIST 4

BOND \$H

HTAB

HTAB N1 O1

EQIV \$1 -x+3, -y+1, -z

HTAB N3 N2\_\$1

HTAB N3 O1\_\$1

FMAP 2

PLAN 10

SIZE 0.40 0.24 0.20

TEMP 23.000

MPLA 9 C12 N2 C13 C14 C15 N4 C16 C17 N3

MPLA 7 C18 C19 C20 C21 C22 C23 Cl1

MPLA 11 C1 C2 C3 C4 C5 C6 C7 C8 C9 C10 C11 C12 O1

MPLA 9 C12 N2 C13 C14 C15 N4 C16 C17 N3

WGHT 0.075700 0.791500

BASF 0.18748

FVAR 10.25644

CL1 5 0.843720 0.660723 -0.442590 11.00000 0.18910 0.15579 =  
0.03694 -0.00168 -0.01765 -0.05358

O1 4 1.505207 0.631141 0.223588 11.00000 0.07565 0.05889 =  
0.05611 -0.00290 -0.00718 0.00569

N1 3 1.169096 0.712051 0.116073 11.00000 0.06622 0.04789 =  
0.03492 -0.00057 -0.00264 0.00309

AFIX 43

H1 2 1.316681 0.667310 0.131723 11.00000 -1.20000

AFIX 0

N2 3 1.233611 0.620577 0.006622 11.00000 0.06953 0.04674 =  
0.03526 0.00020 0.00371 0.00276

N3 3 1.305780 0.522156 -0.099363 11.00000 0.08581 0.05811 =  
0.03457 -0.00187 0.00007 0.01899

AFIX 93

H3A 2 1.422638 0.476107 -0.073272 11.00000 -1.20000

H3B 2 1.275403 0.511139 -0.146252 11.00000 -1.20000

AFIX 0

N4 3 0.894449 0.782108 0.011335 11.00000 0.05776 0.04586 =  
0.04184 -0.00506 -0.00208 0.00046

C1 1 1.359490 0.697474 0.266882 11.00000 0.06921 0.04862 =  
0.03885 0.00054 -0.00460 -0.01164

C2 1 1.427473 0.693255 0.347355 11.00000 0.07188 0.06156 =  
0.04700 0.00682 -0.01196 -0.00411

AFIX 43

H2 2 1.576803 0.641685 0.365800 11.00000 -1.20000

AFIX 0

C3 1 1.279931 0.761810 0.395009 11.00000 0.07914 0.06919 =  
0.03637 0.00406 -0.01830 -0.02048

AFIX 43

H3 2 1.330356 0.756311 0.445923 11.00000 -1.20000

AFIX 0

C4 1 1.047010 0.843650 0.371347 11.00000 0.06659 0.05842 =  
0.03825 -0.00378 0.00076 -0.02433

C5 1 0.898223 0.915265 0.423055 11.00000 0.08559 0.07381 =  
0.03386 -0.00880 0.00065 -0.02634

AFIX 43

H5 2 0.948896 0.908272 0.473926 11.00000 -1.20000

AFIX 0

C6 1 0.681392 0.994754 0.400479 11.00000 0.08208 0.07121 =  
0.05332 -0.01888 0.01469 -0.01382

AFIX 43

H6 2 0.587866 1.042410 0.435310 11.00000 -1.20000

AFIX 0

C7 1 0.601943 1.003635 0.324724 11.00000 0.06935 0.06545 =  
0.05101 -0.00796 0.00462 -0.00178

AFIX 43

H7 2 0.451165 1.056642 0.308993 11.00000 -1.20000

AFIX 0

C8 1 0.743179 0.935250 0.273123 11.00000 0.06461 0.06087 =  
0.04087 -0.00159 0.00019 -0.00830

AFIX 43

H8 2 0.687906 0.943491 0.222608 11.00000 -1.20000

AFIX 0

C9 1 0.968758 0.853075 0.293964 11.00000 0.05619 0.04942 =  
0.03367 -0.00095 0.00007 -0.01702

C10 1 1.124755 0.777884 0.240784 11.00000 0.05516 0.04292 =  
0.03515 0.00189 -0.00020 -0.01039

C11 1 1.038895 0.779186 0.166198 11.00000 0.06320 0.04007 =  
0.03971 0.00086 -0.00515 -0.00412

AFIX 43

H11 2 0.881995 0.829698 0.150473 11.00000 -1.20000

AFIX 0

C12 1 1.091721 0.706242 0.040238 11.00000 0.06054 0.04476 =  
0.03257 0.00237 -0.00097 -0.00791

C13 1 1.170420 0.611475 -0.066810 11.00000 0.06281 0.04575 =  
0.03590 -0.00042 0.00692 -0.00035

C14 1 0.978035 0.691656 -0.106490 11.00000 0.05104 0.04426 =  
0.03574 0.00055 -0.00008 -0.00927

C15 1 0.839686 0.774960 -0.063588 11.00000 0.05277 0.04665 =  
0.03496 -0.00239 -0.00522 -0.00602

C16 1 0.619837 0.864460 -0.094022 11.00000 0.05594 0.06020 =  
0.04648 -0.01122 -0.01085 0.00573

AFIX 23

H16A 2 0.438920 0.867660 -0.063915 11.00000 -1.20000

H16B 2 0.571511 0.848972 -0.145513 11.00000 -1.20000

AFIX 0

C17 1 0.731879 0.972490 -0.093568 11.00000 0.08795 0.05179 =  
0.08462 0.00233 -0.03228 0.00698

AFIX 137

H17A 2 0.808426 0.983545 -0.044450 11.00000 -1.50000

H17B 2 0.571904 1.028182 -0.105070 11.00000 -1.50000

H17C 2 0.886726 0.974607 -0.130896 11.00000 -1.50000

AFIX 0

C18 1 0.940957 0.685305 -0.190453 11.00000 0.05336 0.04536 =  
0.03893 0.00012 -0.00072 -0.00422

C19 1 1.030220 0.761935 -0.239937 11.00000 0.07253 0.05666 =  
0.04353 0.00583 -0.00932 -0.01588

AFIX 43

H19 2 1.112091 0.819797 -0.220837 11.00000 -1.20000

AFIX 0

C20 1 1.001206 0.755110 -0.317715 11.00000 0.09196 0.06916 =  
0.04561 0.01483 -0.00366 -0.02119

AFIX 43

H20 2 1.061097 0.807895 -0.350439 11.00000 -1.20000

AFIX 0

C21 1 0.882531 0.669017 -0.345280 11.00000 0.08426 0.08161 =  
0.03437 -0.00273 -0.00423 -0.01290

C22 1 0.795820 0.590999 -0.298596 11.00000 0.10743 0.07921 =  
0.04463 -0.00893 -0.00591 -0.03502

AFIX 43

H22 2 0.716106 0.532999 -0.318188 11.00000 -1.20000

AFIX 0

C23 1 0.827735 0.598919 -0.221049 11.00000 0.08686 0.06283 =  
0.04518 0.00211 0.00356 -0.02785

AFIX 43

H23 2 0.771632 0.544828 -0.188875 11.00000 -1.20000

AFIX 0

HKLF 5

REM PYMTVAN\_0m in P-1 YELLOW NEEDLE

REM wR2 = 0.2358, GooF = S = 1.139, Restrained GooF = 1.139 for all data

REM R1 = 0.0763 for 2397 Fo > 4sig(Fo) and 0.1311 for all 4351 data

REM 264 parameters refined using 0 restraints

END

**Table S5:** Selected structural parameters for the compounds **DSPIN** and **ACPIN**, calculated using the B3LYP/6-311+G(d,p) approach with the implicit solvent effects from ethanol.

| Selected distances (Å) in DSPIN       |         | Selected distances (Å) in ACPIN       |         |
|---------------------------------------|---------|---------------------------------------|---------|
| H11—H13                               | 2.070   | H11—N4                                | 2.394   |
| H11—N1                                | 2.055   | H1—N2                                 | 2.468   |
| H13—N1                                | 2.744   | H3—N2                                 | 2.456   |
| N2—H3                                 | 2.534   | -                                     | -       |
| Selected dihedral angles (°) in DSPIN |         | Selected dihedral angles (°) in ACPIN |         |
| N1—C11—C10—C1                         | -0.566  | N1—C11—C10—C1                         | -0.042  |
| C11—C10—C1—O1                         | 0.658   | C11—C10—C1—O1                         | 0.257   |
| H1—N1—C1—O1                           | -1.358  | H1—N1—C1—O1                           | 0.102   |
| H13—C13—C11—H1                        | -13.103 | H11—C11—C12—N4                        | -0.139  |
| O3—S1—C18—S2                          | -2.349  | C15—C14—C18—C19                       | 75.940  |
| C10—C11—N1—C12                        | 179.224 | C10—C11—N1—C12                        | 179.570 |

**Table S6.** Second-order perturbation theory analysis results for the compounds **DSPIN** and **ACPIN**, calculated using the B3LYP/6-311+G(d,p) approach with the implicit solvent effects from ethanol.

| Compound     | Donor  | Type     | Acceptor | Type       | E(2), <sup>a</sup><br>kcal/mol | E(j)-E(i),<br>A.U. | F(i,j), A.U. |
|--------------|--------|----------|----------|------------|--------------------------------|--------------------|--------------|
| <b>DSPIN</b> | S1-C15 | $\sigma$ | C13-C14  | $\pi^*$    | 11.88                          | 0.05               | 0.024        |
|              | S2-C18 | $\sigma$ | C13-C14  | $\pi^*$    | 73.93                          | 0.03               | 0.048        |
|              | S2-C19 | $\sigma$ | C13-C14  | $\pi^*$    | 488.92                         | 0.01               | 0.078        |
|              | O1-C1  | $\pi$    | C10      | LP*        | 16.04                          | 0.09               | 0.052        |
|              | N1-C11 | $\sigma$ | C13-C14  | $\pi^*$    | 45.75                          | 0.23               | 0.100        |
|              | N1-C11 | $\sigma$ | C16-H16  | $\sigma^*$ | 721.29                         | 0.03               | 0.137        |
|              | N1-C11 | $\sigma$ | C16-C17  | $\sigma^*$ | 10.00                          | 0.84               | 0.082        |
|              | N1-C11 | $\sigma$ | C10      | LP*        | 67.16                          | 0.11               | 0.113        |
|              | N1-C11 | $\pi$    | O1-C1    | $\pi^*$    | 16.96                          | 0.22               | 0.059        |
|              | N1-C11 | $\pi$    | N1-C11   | $\pi^*$    | 11.58                          | 0.16               | 0.043        |
|              | N1-C11 | $\pi$    | N3-C18   | $\sigma^*$ | 11.91                          | 0.53               | 0.072        |
|              | N1-C11 | $\pi$    | C3-C4    | $\sigma^*$ | 14.40                          | 0.52               | 0.079        |
|              | N1-C11 | $\pi$    | C8-H8    | $\sigma^*$ | 19.88                          | 0.42               | 0.084        |
|              | N1-C11 | $\pi$    | C12-C17  | $\pi^*$    | 28.92                          | 0.36               | 0.098        |
|              | N1-C11 | $\pi$    | C14-H14  | $\sigma^*$ | 11.58                          | 0.54               | 0.072        |
|              | N1-C11 | $\pi$    | C14-C15  | $\sigma^*$ | 14.94                          | 0.66               | 0.090        |
|              | N1-C11 | $\pi$    | C16-C17  | $\sigma^*$ | 39.19                          | 0.34               | 0.106        |
|              | N1-C11 | $\pi$    | C19-C20  | $\sigma^*$ | 14.83                          | 1.65               | 0.143        |
|              | N1-C12 | $\sigma$ | O1-C1    | $\sigma^*$ | 12.76                          | 1.16               | 0.109        |
|              | N1-C12 | $\sigma$ | O1-C1    | $\pi^*$    | 11.77                          | 0.72               | 0.091        |
|              | N1-C12 | $\sigma$ | N1-C11   | $\pi^*$    | 12.79                          | 0.66               | 0.094        |
|              | N1-C12 | $\sigma$ | N3-H3    | $\sigma^*$ | 14.54                          | 1.03               | 0.110        |
|              | N1-C12 | $\sigma$ | N3-C18   | $\sigma^*$ | 18.32                          | 1.03               | 0.124        |
|              | N1-C12 | $\sigma$ | N3-C20   | $\sigma^*$ | 11.80                          | 1.09               | 0.101        |
|              | N1-C12 | $\sigma$ | C3-C4    | $\sigma^*$ | 22.97                          | 1.02               | 0.137        |
|              | N1-C12 | $\sigma$ | C5-H5    | $\sigma^*$ | 11.25                          | 1.13               | 0.101        |
|              | N1-C12 | $\sigma$ | C8-H8    | $\sigma^*$ | 29.43                          | 0.92               | 0.147        |



|  |        |          |         |            |         |      |       |
|--|--------|----------|---------|------------|---------|------|-------|
|  | N1-C12 | $\sigma$ | C13-C14 | $\sigma^*$ | 232.83  | 0.23 | 0.225 |
|  | N1-C12 | $\sigma$ | C14-H14 | $\sigma^*$ | 18.62   | 1.04 | 0.124 |
|  | N1-C12 | $\sigma$ | C14-C15 | $\sigma^*$ | 27.12   | 1.15 | 0.158 |
|  | N1-C12 | $\sigma$ | C16-H16 | $\sigma^*$ | 3398.88 | 0.03 | 0.297 |
|  | N1-C12 | $\sigma$ | C16-C17 | $\sigma^*$ | 72.22   | 0.84 | 0.220 |
|  | N1-C12 | $\sigma$ | C19-C20 | $\sigma^*$ | 33.24   | 2.15 | 0.239 |
|  | N3-H3  | $\sigma$ | O1-C1   | $\pi^*$    | 11.45   | 0.54 | 0.078 |
|  | N3-H3  | $\sigma$ | N3-C18  | $\sigma^*$ | 15.56   | 0.85 | 0.103 |
|  | N3-H3  | $\sigma$ | C7-H7   | $\sigma^*$ | 20.49   | 1.03 | 0.130 |
|  | N3-H3  | $\sigma$ | C13-C14 | $\pi^*$    | 411.36  | 0.06 | 0.145 |
|  | N3-C18 | $\sigma$ | C14-C15 | $\sigma^*$ | 13.79   | 1.15 | 0.113 |
|  | N3-C18 | $\sigma$ | C16-H16 | $\sigma^*$ | 1845.82 | 0.03 | 0.208 |
|  | N3-C18 | $\sigma$ | C16-C17 | $\sigma^*$ | 11.91   | 0.84 | 0.089 |
|  | N3-C18 | $\sigma$ | C19-C20 | $\sigma^*$ | 14.53   | 2.15 | 0.158 |
|  | N3-C20 | $\sigma$ | C10     | LP*        | 58.17   | 0.73 | 0.279 |
|  | N3-C20 | $\sigma$ | S1-N2   | $\sigma^*$ | 12.45   | 1.09 | 0.109 |
|  | N3-C20 | $\sigma$ | O1-C1   | $\sigma^*$ | 64.05   | 1.28 | 0.256 |
|  | N3-C20 | $\sigma$ | O1-C1   | $\pi^*$    | 87.73   | 0.84 | 0.269 |
|  | N3-C20 | $\sigma$ | N1-C10  | $\pi^*$    | 51.63   | 0.78 | 0.205 |
|  | N3-C20 | $\sigma$ | N1-C12  | $\sigma^*$ | 17.15   | 1.35 | 0.136 |
|  | N3-C20 | $\sigma$ | N2-C18  | $\sigma^*$ | 50.01   | 1.40 | 0.236 |
|  | N3-C20 | $\sigma$ | N3-H3   | $\sigma^*$ | 83.44   | 1.15 | 0.277 |
|  | N3-C20 | $\sigma$ | N3-C18  | $\sigma^*$ | 151.39  | 1.15 | 0.375 |
|  | N3-C20 | $\sigma$ | N3-C20  | $\sigma^*$ | 36.47   | 1.21 | 0.187 |
|  | N3-C20 | $\sigma$ | C1-C10  | $\sigma^*$ | 12.80   | 1.40 | 0.121 |
|  | N3-C20 | $\sigma$ | C2-H2   | $\sigma^*$ | 18.56   | 1.36 | 0.142 |
|  | N3-C20 | $\sigma$ | C3-C4   | $\sigma^*$ | 117.54  | 1.14 | 0.327 |
|  | N3-C20 | $\sigma$ | C4-C9   | $\sigma^*$ | 19.73   | 1.43 | 0.151 |
|  | N3-C20 | $\sigma$ | C5-H5   | $\sigma^*$ | 45.14   | 1.25 | 0.212 |
|  | N3-C20 | $\sigma$ | C6-H6   | $\sigma^*$ | 11.61   | 1.38 | 0.113 |
|  | N3-C20 | $\sigma$ | C6-C7   | $\sigma^*$ | 30.48   | 1.46 | 0.188 |
|  | N3-C20 | $\sigma$ | C7-H7   | $\sigma^*$ | 108.06  | 1.32 | 0.338 |

|  |        |          |         |            |         |      |       |
|--|--------|----------|---------|------------|---------|------|-------|
|  | N3-C20 | $\sigma$ | C8-H8   | $\sigma^*$ | 131.77  | 1.04 | 0.330 |
|  | N3-C20 | $\sigma$ | C9-C10  | $\sigma^*$ | 22.32   | 1.42 | 0.160 |
|  | N3-C20 | $\sigma$ | C11-H11 | $\sigma^*$ | 24.91   | 1.28 | 0.159 |
|  | N3-C20 | $\sigma$ | C13-C14 | $\pi^*$    | 969.38  | 0.35 | 0.563 |
|  | N3-C20 | $\sigma$ | C14-H14 | $\sigma^*$ | 83.01   | 1.16 | 0.277 |
|  | N3-C20 | $\sigma$ | C14-C15 | $\sigma^*$ | 78.10   | 1.27 | 0.282 |
|  | N3-C20 | $\sigma$ | C15-C16 | $\pi^*$    | 12.92   | 0.96 | 0.110 |
|  | N3-C20 | $\sigma$ | C16-H16 | $\sigma^*$ | 2881.41 | 0.15 | 0.590 |
|  | N3-C20 | $\sigma$ | C16-C17 | $\sigma^*$ | 196.69  | 0.96 | 0.388 |
|  | N3-C20 | $\sigma$ | C19-C20 | $\sigma^*$ | 207.91  | 2.27 | 0.613 |
|  | N3-C20 | $\sigma$ | C19-C20 | $\pi^*$    | 13.27   | 2.57 | 0.174 |
|  | C1-C2  | $\sigma$ | O1-C1   | $\sigma^*$ | 24.75   | 1.01 | 0.141 |
|  | C1-C2  | $\sigma$ | O1-C1   | $\pi^*$    | 13.65   | 0.56 | 0.087 |
|  | C1-C2  | $\sigma$ | N1-C10  | $\pi^*$    | 16.22   | 0.50 | 0.092 |
|  | C1-C2  | $\sigma$ | N3-H3   | $\sigma^*$ | 16.27   | 0.88 | 0.107 |
|  | C1-C2  | $\sigma$ | N3-C18  | $\sigma^*$ | 19.40   | 0.87 | 0.117 |
|  | C1-C2  | $\sigma$ | N3-C20  | $\sigma^*$ | 12.29   | 0.93 | 0.096 |
|  | C1-C2  | $\sigma$ | C1-C10  | $\sigma^*$ | 10.15   | 1.13 | 0.096 |
|  | C1-C2  | $\sigma$ | C3-C4   | $\sigma^*$ | 24.50   | 0.86 | 0.130 |
|  | C1-C2  | $\sigma$ | C5-H5   | $\sigma^*$ | 12.33   | 0.97 | 0.098 |
|  | C1-C2  | $\sigma$ | C8-H8   | $\sigma^*$ | 31.78   | 0.76 | 0.139 |
|  | C1-C2  | $\sigma$ | C13-C14 | $\pi^*$    | 652.58  | 0.08 | 0.214 |
|  | C1-C2  | $\sigma$ | C14-H14 | $\sigma^*$ | 20.55   | 0.88 | 0.120 |
|  | C1-C2  | $\sigma$ | C14-C15 | $\sigma^*$ | 27.87   | 1.00 | 0.149 |
|  | C1-C2  | $\sigma$ | C16-C17 | $\sigma^*$ | 55.81   | 0.68 | 0.175 |
|  | C1-C2  | $\sigma$ | C19-C20 | $\sigma^*$ | 32.91   | 1.99 | 0.229 |
|  | C2-C3  | $\pi$    | C10     | LP*        | 27.40   | 0.16 | 0.078 |
|  | C2-C3  | $\pi$    | O1-C1   | $\pi^*$    | 86.00   | 0.11 | 0.093 |
|  | C3-C4  | $\sigma$ | C13-C14 | $\pi^*$    | 96.51   | 0.03 | 0.050 |
|  | C5-C6  | $\pi$    | C10     | LP*        | 41.86   | 0.15 | 0.088 |
|  | C5-C6  | $\pi$    | C7-C8   | $\pi^*$    | 20.55   | 0.28 | 0.068 |
|  | C7-C8  | $\pi$    | C9      | LP*        | 19.68   | 0.35 | 0.091 |

|  |       |          |         |            |        |      |       |
|--|-------|----------|---------|------------|--------|------|-------|
|  | C7-C8 | $\pi$    | C10     | LP*        | 130.61 | 0.19 | 0.185 |
|  | C7-C8 | $\pi$    | S1-N2   | $\sigma^*$ | 38.33  | 0.55 | 0.133 |
|  | C7-C8 | $\pi$    | O1-C1   | $\sigma^*$ | 70.65  | 0.74 | 0.221 |
|  | C7-C8 | $\pi$    | O1-C1   | $\pi^*$    | 131.51 | 0.30 | 0.182 |
|  | C7-C8 | $\pi$    | N1-C11  | $\pi^*$    | 168.05 | 0.24 | 0.188 |
|  | C7-C8 | $\pi$    | N1-C12  | $\sigma^*$ | 14.71  | 0.81 | 0.105 |
|  | C7-C8 | $\pi$    | N2-C18  | $\sigma^*$ | 35.24  | 0.86 | 0.167 |
|  | C7-C8 | $\pi$    | N3-H3   | $\sigma^*$ | 76.43  | 0.61 | 0.208 |
|  | C7-C8 | $\pi$    | N3-C18  | $\sigma^*$ | 113.45 | 0.61 | 0.252 |
|  | C7-C8 | $\pi$    | N3-C20  | $\sigma^*$ | 64.25  | 0.67 | 0.200 |
|  | C7-C8 | $\pi$    | C1-C10  | $\sigma^*$ | 18.61  | 0.87 | 0.121 |
|  | C7-C8 | $\pi$    | C2-H2   | $\sigma^*$ | 25.20  | 0.82 | 0.139 |
|  | C7-C8 | $\pi$    | C3-C4   | $\sigma^*$ | 130.11 | 0.60 | 0.268 |
|  | C7-C8 | $\pi$    | C4-C9   | $\sigma^*$ | 23.14  | 0.89 | 0.138 |
|  | C7-C8 | $\pi$    | C5-H5   | $\sigma^*$ | 59.27  | 0.71 | 0.198 |
|  | C7-C8 | $\pi$    | C5-C6   | $\sigma^*$ | 12.10  | 0.49 | 0.069 |
|  | C7-C8 | $\pi$    | C6-H6   | $\sigma^*$ | 14.18  | 0.84 | 0.105 |
|  | C7-C8 | $\pi$    | C6-C7   | $\sigma^*$ | 25.16  | 0.92 | 0.146 |
|  | C7-C8 | $\pi$    | C7-H7   | $\sigma^*$ | 39.74  | 0.78 | 0.170 |
|  | C7-C8 | $\pi$    | C8-H8   | $\sigma^*$ | 170.45 | 0.50 | 0.281 |
|  | C7-C8 | $\pi$    | C9-C10  | $\sigma^*$ | 17.31  | 0.88 | 0.119 |
|  | C7-C8 | $\pi$    | C11-H11 | $\sigma^*$ | 36.39  | 0.74 | 0.158 |
|  | C7-C8 | $\pi$    | C12-C13 | $\sigma^*$ | 10.35  | 0.96 | 0.096 |
|  | C7-C8 | $\pi$    | C12-C17 | $\pi^*$    | 16.40  | 0.44 | 0.077 |
|  | C7-C8 | $\pi$    | C14-H14 | $\sigma^*$ | 109.14 | 0.62 | 0.250 |
|  | C7-C8 | $\pi$    | C14-C15 | $\sigma^*$ | 145.20 | 0.73 | 0.314 |
|  | C7-C8 | $\pi$    | C15-C16 | $\pi^*$    | 35.76  | 0.42 | 0.112 |
|  | C7-C8 | $\pi$    | C16-C17 | $\sigma^*$ | 311.99 | 0.42 | 0.349 |
|  | C7-C8 | $\pi$    | C19-C20 | $\sigma^*$ | 168.27 | 1.73 | 0.520 |
|  | C7-C8 | $\pi$    | C19-C20 | $\pi^*$    | 41.34  | 2.03 | 0.264 |
|  | C8-H8 | $\sigma$ | C4-C9   | $\sigma^*$ | 11.67  | 0.97 | 0.095 |
|  | C8-H8 | $\sigma$ | C6-C7   | $\sigma^*$ | 12.28  | 0.99 | 0.099 |

|  |         |          |         |            |        |      |       |
|--|---------|----------|---------|------------|--------|------|-------|
|  | C8-H8   | $\sigma$ | C8-H8   | $\sigma^*$ | 16.39  | 0.58 | 0.087 |
|  | C8-H8   | $\sigma$ | C16-C17 | $\sigma^*$ | 24.59  | 0.50 | 0.099 |
|  | C8-C9   | $\sigma$ | C13-C14 | $\pi^*$    | 231.30 | 0.06 | 0.113 |
|  | C8-C9   | $\sigma$ | C16-C17 | $\sigma^*$ | 16.68  | 0.67 | 0.094 |
|  | C8-C9   | $\sigma$ | C19-C20 | $\sigma^*$ | 12.61  | 1.98 | 0.141 |
|  | C12-C13 | $\sigma$ | C13-C14 | $\pi^*$    | 19.77  | 0.08 | 0.038 |
|  | C12-C17 | $\sigma$ | O1-C1   | $\sigma^*$ | 11.17  | 1.04 | 0.097 |
|  | C12-C17 | $\sigma$ | O1-C1   | $\pi^*$    | 10.20  | 0.60 | 0.077 |
|  | C12-C17 | $\sigma$ | N1-C11  | $\sigma^*$ | 12.24  | 0.54 | 0.083 |
|  | C12-C17 | $\sigma$ | N3-H3   | $\sigma^*$ | 11.74  | 0.91 | 0.092 |
|  | C12-C17 | $\sigma$ | N3-C18  | $\sigma^*$ | 15.15  | 0.91 | 0.105 |
|  | C12-C17 | $\sigma$ | C3-C4   | $\sigma^*$ | 18.64  | 0.90 | 0.115 |
|  | C12-C17 | $\sigma$ | C8-H8   | $\sigma^*$ | 23.39  | 0.80 | 0.122 |
|  | C12-C17 | $\sigma$ | C13-C14 | $\pi^*$    | 333.15 | 0.11 | 0.184 |
|  | C12-C17 | $\sigma$ | C14-H14 | $\sigma^*$ | 15.18  | 0.92 | 0.106 |
|  | C12-C17 | $\sigma$ | C14-C15 | $\sigma^*$ | 20.97  | 1.03 | 0.131 |
|  | C12-C17 | $\sigma$ | C16-C17 | $\sigma^*$ | 72.89  | 0.72 | 0.205 |
|  | C12-C17 | $\sigma$ | C19-C20 | $\sigma^*$ | 32.78  | 2.03 | 0.231 |
|  | C12-C17 | $\pi$    | C10     | LP*        | 82.01  | 0.01 | 0.038 |
|  | C12-C17 | $\pi$    | O1-C1   | $\pi^*$    | 16.42  | 0.12 | 0.040 |
|  | C12-C17 | $\pi$    | C8-H8   | $\sigma^*$ | 12.14  | 0.32 | 0.062 |
|  | C12-C17 | $\pi$    | C15-C16 | $\pi^*$    | 12.95  | 0.24 | 0.050 |
|  | C12-C17 | $\pi$    | C16-C17 | $\sigma^*$ | 24.11  | 0.24 | 0.076 |
|  | C13-C14 | $\pi$    | C12-C17 | $\pi^*$    | 24.51  | 0.25 | 0.071 |
|  | C13-C14 | $\pi$    | C15-C16 | $\pi^*$    | 21.09  | 0.23 | 0.063 |
|  | C14-C15 | $\sigma$ | C8-H8   | $\sigma^*$ | 11.40  | 0.80 | 0.085 |
|  | C14-C15 | $\sigma$ | C13-C14 | $\pi^*$    | 158.26 | 0.11 | 0.126 |
|  | C14-C15 | $\sigma$ | C14-H14 | $\sigma^*$ | 16.31  | 0.91 | 0.109 |
|  | C14-C15 | $\sigma$ | C14-C15 | $\sigma^*$ | 10.33  | 1.03 | 0.092 |
|  | C14-C15 | $\sigma$ | C16-C17 | $\sigma^*$ | 20.20  | 0.72 | 0.108 |
|  | C14-C15 | $\sigma$ | C19-C20 | $\sigma^*$ | 16.24  | 2.03 | 0.162 |
|  | C15-C16 | $\pi$    | C12-C17 | $\pi^*$    | 16.49  | 0.26 | 0.059 |

|  |         |          |         |            |         |      |       |
|--|---------|----------|---------|------------|---------|------|-------|
|  | C19-H19 | $\sigma$ | C10     | LP*        | 17.35   | 0.33 | 0.102 |
|  | C19-H19 | $\sigma$ | O1-C1   | $\pi^*$    | 21.29   | 0.44 | 0.096 |
|  | C19-H19 | $\sigma$ | N3-C18  | $\sigma^*$ | 35.50   | 0.75 | 0.147 |
|  | C19-H19 | $\sigma$ | C3-C4   | $\sigma^*$ | 18.19   | 0.74 | 0.104 |
|  | C19-H19 | $\sigma$ | C7-H7   | $\sigma^*$ | 24.00   | 0.93 | 0.133 |
|  | C19-H19 | $\sigma$ | C8-H8   | $\sigma^*$ | 20.22   | 0.64 | 0.102 |
|  | C19-H19 | $\sigma$ | C14-H14 | $\sigma^*$ | 10.37   | 0.76 | 0.079 |
|  | C19-H19 | $\sigma$ | C16-C17 | $\sigma^*$ | 29.30   | 0.56 | 0.115 |
|  | C19-H19 | $\sigma$ | C10     | LP*        | 32.14   | 0.41 | 0.156 |
|  | C19-C20 | $\sigma$ | O1-C1   | $\sigma^*$ | 14.12   | 0.97 | 0.105 |
|  | C19-C20 | $\sigma$ | O1-C1   | $\pi^*$    | 0.97    | 0.52 | 0.146 |
|  | C19-C20 | $\sigma$ | N1-C11  | $\pi^*$    | 12.50   | 0.46 | 0.078 |
|  | C19-C20 | $\sigma$ | N3-H3   | $\sigma^*$ | 37.62   | 0.84 | 0.159 |
|  | C19-C20 | $\sigma$ | N3-C18  | $\sigma^*$ | 83.30   | 0.84 | 0.237 |
|  | C19-C20 | $\sigma$ | C3-C4   | $\sigma^*$ | 32.01   | 0.82 | 0.145 |
|  | C19-C20 | $\sigma$ | C7-H7   | $\sigma^*$ | 53.34   | 1.01 | 0.207 |
|  | C19-C20 | $\sigma$ | C8-H8   | $\sigma^*$ | 32.23   | 0.73 | 0.137 |
|  | C19-C20 | $\sigma$ | C13-C14 | $\pi^*$    | 1909.55 | 0.04 | 0.262 |
|  | C19-C20 | $\sigma$ | C14-H14 | $\sigma^*$ | 17.35   | 0.84 | 0.108 |
|  | C19-C20 | $\sigma$ | C14-C15 | $\sigma^*$ | 12.04   | 0.96 | 0.096 |
|  | C19-C20 | $\sigma$ | C16-C17 | $\sigma^*$ | 42.21   | 0.65 | 0.147 |
|  | C19-C20 | $\sigma$ | C19-C20 | $\sigma^*$ | 11.45   | 1.96 | 0.134 |
|  | C19-C20 | $\sigma$ | C19-C20 | $\pi^*$    | 12.62   | 2.25 | 0.159 |
|  | C19-C20 | $\sigma$ | C10     | LP*        | 10.99   | 0.04 | 0.029 |
|  | C19-C20 | $\pi$    | N1-C11  | $\pi^*$    | 10.25   | 0.09 | 0.03  |
|  | C19-C20 | $\pi$    | C16-C17 | $\sigma^*$ | 15.59   | 0.28 | 0.059 |
|  | C19-C20 | $\pi$    | C19-C20 | $\sigma^*$ | 18.87   | 1.59 | 0.156 |
|  | C20-H20 | $\sigma$ | S1-N2   | $\sigma^*$ | 108.32  | 0.30 | 0.169 |
|  | C20-H20 | $\sigma$ | S1-C15  | $\sigma^*$ | 11.29   | 0.36 | 0.060 |
|  | C20-H20 | $\sigma$ | S2-C18  | $\sigma^*$ | 15.63   | 0.34 | 0.066 |
|  | C20-H20 | $\sigma$ | S2-C19  | $\sigma^*$ | 12.63   | 0.40 | 0.063 |
|  | C20-H20 | $\sigma$ | O1-C1   | $\sigma^*$ | 153.06  | 0.50 | 0.247 |

|  |         |          |         |            |         |      |       |
|--|---------|----------|---------|------------|---------|------|-------|
|  | C20-H20 | $\sigma$ | O1-C1   | $\pi^*$    | 514.97  | 0.05 | 0.160 |
|  | C20-H20 | $\sigma$ | N1-C12  | $\sigma^*$ | 25.31   | 0.56 | 0.107 |
|  | C20-H20 | $\sigma$ | N2-C18  | $\sigma^*$ | 58.84   | 0.61 | 0.169 |
|  | C20-H20 | $\sigma$ | N3-H3   | $\sigma^*$ | 127.53  | 0.36 | 0.193 |
|  | C20-H20 | $\sigma$ | N3-C18  | $\sigma^*$ | 123.77  | 0.36 | 0.190 |
|  | C20-H20 | $\sigma$ | N3-C20  | $\sigma^*$ | 178.70  | 0.42 | 0.245 |
|  | C20-H20 | $\sigma$ | C1-C10  | $\sigma^*$ | 35.48   | 0.62 | 0.133 |
|  | C20-H20 | $\sigma$ | C2-H2   | $\sigma^*$ | 47.34   | 0.57 | 0.147 |
|  | C20-H20 | $\sigma$ | C3-C4   | $\sigma^*$ | 280.99  | 0.35 | 0.281 |
|  | C20-H20 | $\sigma$ | C4-C5   | $\sigma^*$ | 17.90   | 0.71 | 0.101 |
|  | C20-H20 | $\sigma$ | C4-C9   | $\sigma^*$ | 43.58   | 0.64 | 0.150 |
|  | C20-H20 | $\sigma$ | C5-H5   | $\sigma^*$ | 128.94  | 0.46 | 0.219 |
|  | C20-H20 | $\sigma$ | C6-H6   | $\sigma^*$ | 32.84   | 0.60 | 0.125 |
|  | C20-H20 | $\sigma$ | C6-C7   | $\sigma^*$ | 44.44   | 0.67 | 0.15  |
|  | C20-H20 | $\sigma$ | C7-H7   | $\sigma^*$ | 26.15   | 0.54 | 0.106 |
|  | C20-H20 | $\sigma$ | C8-H8   | $\sigma^*$ | 483.59  | 0.25 | 0.313 |
|  | C20-H20 | $\sigma$ | C9-C10  | $\sigma^*$ | 35.16   | 0.64 | 0.134 |
|  | C20-H20 | $\sigma$ | C11-H11 | $\sigma^*$ | 94.60   | 0.49 | 0.193 |
|  | C20-H20 | $\sigma$ | C12-C13 | $\sigma^*$ | 43.74   | 0.71 | 0.157 |
|  | C20-H20 | $\sigma$ | C12-C17 | $\sigma^*$ | 13.27   | 0.73 | 0.088 |
|  | C20-H20 | $\sigma$ | C12-C17 | $\pi^*$    | 40.87   | 0.19 | 0.086 |
|  | C20-H20 | $\sigma$ | C14-H14 | $\sigma^*$ | 232.13  | 0.37 | 0.263 |
|  | C20-H20 | $\sigma$ | C14-C15 | $\sigma^*$ | 297.77  | 0.49 | 0.340 |
|  | C20-H20 | $\sigma$ | C15-C16 | $\sigma^*$ | 16.07   | 0.81 | 0.102 |
|  | C20-H20 | $\sigma$ | C15-C16 | $\pi^*$    | 85.43   | 0.17 | 0.119 |
|  | C20-H20 | $\sigma$ | C16-C17 | $\sigma^*$ | 1183.19 | 0.17 | 0.404 |
|  | C20-H20 | $\sigma$ | C19-C20 | $\sigma^*$ | 254.36  | 1.48 | 0.550 |
|  | C20-H20 | $\sigma$ | C19-C20 | $\pi^*$    | 41.82   | 1.78 | 0.256 |
|  | S2      | LP       | N2-C18  | $\pi^*$    | 35.28   | 0.21 | 0.082 |
|  | O1      | LP       | N1-H1   | $\sigma^*$ | 16.20   | 0.67 | 0.094 |
|  | O1      | LP       | C1-C2   | $\sigma^*$ | 15.17   | 0.79 | 0.099 |
|  | O1      | LP       | C1-C10  | $\sigma^*$ | 12.60   | 0.70 | 0.085 |

|  |     |    |         |            |        |      |       |
|--|-----|----|---------|------------|--------|------|-------|
|  | O2  | LP | C10     | LP*        | 27.79  | 0.05 | 0.046 |
|  | O2  | LP | S1-N2   | $\sigma^*$ | 33.71  | 0.41 | 0.106 |
|  | O2  | LP | S1-C15  | $\sigma^*$ | 16.06  | 0.47 | 0.078 |
|  | O2  | LP | O1-C1   | $\pi^*$    | 15.95  | 0.16 | 0.048 |
|  | O2  | LP | N1-C11  | $\pi^*$    | 26.86  | 0.10 | 0.050 |
|  | O2  | LP | C3-C4   | $\sigma^*$ | 12.82  | 0.46 | 0.071 |
|  | O2  | LP | C8-H8   | $\sigma^*$ | 18.50  | 0.36 | 0.076 |
|  | O2  | LP | C14-C15 | $\sigma^*$ | 14.20  | 0.59 | 0.085 |
|  | O2  | LP | C16-C17 | $\sigma^*$ | 38.46  | 0.28 | 0.096 |
|  | O2  | LP | C19-C20 | $\sigma^*$ | 11.85  | 1.59 | 0.128 |
|  | O2  | LP | S1-O3   | $\sigma^*$ | 21.00  | 0.56 | 0.097 |
|  | O2  | LP | S1-N2   | $\sigma^*$ | 10.24  | 0.39 | 0.057 |
|  | O3  | LP | S1-C15  | $\sigma^*$ | 15.65  | 0.46 | 0.076 |
|  | O3  | LP | S1-O2   | $\sigma^*$ | 16.80  | 0.57 | 0.088 |
|  | O3  | LP | S1-N2   | $\sigma^*$ | 19.54  | 0.40 | 0.079 |
|  | N2  | LP | S2-C18  | $\sigma^*$ | 19.06  | 0.54 | 0.092 |
|  | N2  | LP | N2-C18  | $\pi^*$    | 68.12  | 0.24 | 0.117 |
|  | C16 | LP | C2-C3   | $\pi^*$    | 48.99  | 0.15 | 0.099 |
|  | C16 | LP | C5-C6   | $\pi^*$    | 63.96  | 0.14 | 0.104 |
|  | C10 | LP | C9      | LP*        | 110.94 | 0.16 | 0.123 |
|  | C10 | LP | S1-N2   | $\sigma^*$ | 33.64  | 0.36 | 0.119 |
|  | C10 | LP | O1-C1   | $\sigma^*$ | 48.54  | 0.55 | 0.193 |
|  | C10 | LP | O1-C1   | $\pi^*$    | 14.12  | 0.11 | 0.040 |
|  | C10 | LP | N1-C11  | $\pi^*$    | 23.53  | 0.05 | 0.034 |
|  | C10 | LP | N2-C18  | $\sigma^*$ | 24.53  | 0.67 | 0.150 |
|  | C10 | LP | N3-H3   | $\sigma^*$ | 61.89  | 0.42 | 0.189 |
|  | C10 | LP | N3-C18  | $\sigma^*$ | 73.59  | 0.42 | 0.204 |
|  | C10 | LP | N3-C20  | $\sigma^*$ | 42.25  | 0.48 | 0.167 |
|  | C10 | LP | C1-C10  | $\sigma^*$ | 12.17  | 0.68 | 0.105 |
|  | C10 | LP | C2-H2   | $\sigma^*$ | 16.26  | 0.63 | 0.119 |
|  | C10 | LP | C3-C4   | $\sigma^*$ | 94.51  | 0.41 | 0.230 |
|  | C10 | LP | C4-C9   | $\sigma^*$ | 14.95  | 0.70 | 0.119 |

|              |         |          |          |            |        |      |       |
|--------------|---------|----------|----------|------------|--------|------|-------|
|              | C10     | LP       | C5-H5    | $\sigma^*$ | 40.85  | 0.52 | 0.171 |
|              | C10     | LP       | C6-C7    | $\sigma^*$ | 15.75  | 0.73 | 0.126 |
|              | C10     | LP       | C7-H7    | $\sigma^*$ | 22.29  | 0.59 | 0.135 |
|              | C10     | LP       | C8-H8    | $\sigma^*$ | 138.98 | 0.31 | 0.244 |
|              | C10     | LP       | C9-C10   | $\sigma^*$ | 11.39  | 0.69 | 0.104 |
|              | C10     | LP       | C11-H11  | $\sigma^*$ | 25.91  | 0.55 | 0.140 |
|              | C10     | LP       | C12-C17  | $\pi^*$    | 16.34  | 0.25 | 0.065 |
|              | C10     | LP       | C14-H14  | $\sigma^*$ | 77.78  | 0.43 | 0.214 |
|              | C10     | LP       | C14-C15  | $\sigma^*$ | 98.43  | 0.54 | 0.270 |
|              | C10     | LP       | C15-C16  | $\pi^*$    | 39.87  | 0.23 | 0.097 |
|              | C10     | LP       | C16-C17  | $\sigma^*$ | 292.73 | 0.23 | 0.305 |
|              | C10     | LP       | C19-C20  | $\sigma^*$ | 89.46  | 1.54 | 0.435 |
|              | C10     | LP       | C19-C20  | $\pi^*$    | 23.71  | 1.84 | 0.226 |
| <b>ACPIN</b> | C11-C21 | $\sigma$ | C22-C23  | $\sigma^*$ | 10.92  | 1.07 | 0.097 |
|              | N1-C11  | $\sigma$ | C1       | LP*        | 15.24  | 0.75 | 0.123 |
|              | N1-C11  | $\sigma$ | C11-C21  | $\sigma^*$ | 22.06  | 0.98 | 0.132 |
|              | N1-C11  | $\sigma$ | O1-C1    | $\sigma^*$ | 13.43  | 1.41 | 0.123 |
|              | N1-C11  | $\sigma$ | C1-C2    | $\sigma^*$ | 54.37  | 1.09 | 0.219 |
|              | N1-C11  | $\sigma$ | C1-C10   | $\sigma^*$ | 23.67  | 1.28 | 0.157 |
|              | N1-C11  | $\sigma$ | C4-C5    | $\sigma^*$ | 94.15  | 0.96 | 0.269 |
|              | N1-C11  | $\sigma$ | C4-C5    | $\pi^*$    | 68.66  | 0.66 | 0.213 |
|              | N1-C11  | $\sigma$ | C4-C9    | $\sigma^*$ | 44.00  | 1.18 | 0.204 |
|              | N1-C11  | $\sigma$ | C6-C7    | $\sigma^*$ | 18.50  | 1.45 | 0.146 |
|              | N1-C11  | $\sigma$ | C6-C7    | $\pi^*$    | 17.24  | 0.92 | 0.125 |
|              | N1-C11  | $\sigma$ | C7-C8    | $\sigma^*$ | 135.10 | 0.84 | 0.301 |
|              | N1-C11  | $\sigma$ | C8-H8    | $\sigma^*$ | 175.12 | 0.68 | 0.308 |
|              | N1-C11  | $\sigma$ | C8-C9    | $\sigma^*$ | 25.94  | 1.31 | 0.165 |
|              | N1-C11  | $\sigma$ | C9-C10   | $\sigma^*$ | 30.07  | 1.33 | 0.179 |
|              | N1-C11  | $\sigma$ | C10-C11  | $\pi^*$    | 13.04  | 0.91 | 0.105 |
|              | N1-C11  | $\sigma$ | C13-C18  | $\sigma^*$ | 10.20  | 1.41 | 0.108 |
|              | N1-C11  | $\sigma$ | C15-C16  | $\sigma^*$ | 37.42  | 1.22 | 0.191 |
|              | N1-C11  | $\sigma$ | C16-H16A | $\sigma^*$ | 213.17 | 0.59 | 0.317 |



|  |        |          |          |            |         |      |       |
|--|--------|----------|----------|------------|---------|------|-------|
|  | N1-C11 | $\sigma$ | C17-H17A | $\sigma^*$ | 13.95   | 1.33 | 0.122 |
|  | N1-C11 | $\sigma$ | C18-C19  | $\pi^*$    | 125.52  | 0.64 | 0.278 |
|  | N1-C11 | $\sigma$ | C18-C23  | $\sigma^*$ | 11.38   | 3.35 | 0.175 |
|  | N1-C11 | $\sigma$ | C19-C20  | $\sigma^*$ | 111.63  | 1.04 | 0.304 |
|  | N1-C11 | $\sigma$ | C20-H20  | $\sigma^*$ | 19.91   | 1.28 | 0.143 |
|  | N1-C11 | $\sigma$ | C20-C21  | $\sigma^*$ | 163.51  | 0.87 | 0.339 |
|  | N1-C11 | $\sigma$ | C20-C21  | $\pi^*$    | 4137.13 | 0.04 | 0.388 |
|  | N1-C11 | $\sigma$ | C22-C23  | $\sigma^*$ | 318.92  | 1.34 | 0.584 |
|  | N1-C11 | $\sigma$ | C22-C23  | $\pi^*$    | 210.62  | 1.15 | 0.476 |
|  | N1-C12 | $\sigma$ | C1       | LP*        | 36.66   | 0.97 | 0.217 |
|  | N1-C12 | $\sigma$ | C11-C21  | $\sigma^*$ | 55.54   | 1.20 | 0.231 |
|  | N1-C12 | $\sigma$ | O1-C1    | $\sigma^*$ | 31.19   | 1.63 | 0.202 |
|  | N1-C12 | $\sigma$ | N1-C11   | $\sigma^*$ | 11.22   | 1.69 | 0.123 |
|  | N1-C12 | $\sigma$ | N3-H3A   | $\sigma^*$ | 16.50   | 1.57 | 0.144 |
|  | N1-C12 | $\sigma$ | N3-C13   | $\sigma^*$ | 23.81   | 1.59 | 0.174 |
|  | N1-C12 | $\sigma$ | N4-C12   | $\sigma^*$ | 28.51   | 1.67 | 0.196 |
|  | N1-C12 | $\sigma$ | N4-C15   | $\sigma^*$ | 11.63   | 1.70 | 0.126 |
|  | N1-C12 | $\sigma$ | C1-C2    | $\sigma^*$ | 142.93  | 1.31 | 0.389 |
|  | N1-C12 | $\sigma$ | C1-C10   | $\sigma^*$ | 58.66   | 1.50 | 0.267 |
|  | N1-C12 | $\sigma$ | C2-C3    | $\sigma^*$ | 21.08   | 1.75 | 0.172 |
|  | N1-C12 | $\sigma$ | C2-C3    | $\pi^*$    | 22.85   | 1.18 | 0.15  |
|  | N1-C12 | $\sigma$ | C3-H3    | $\sigma^*$ | 25.36   | 1.56 | 0.17  |
|  | N1-C12 | $\sigma$ | C4-C5    | $\sigma^*$ | 233.44  | 1.17 | 0.468 |
|  | N1-C12 | $\sigma$ | C4-C5    | $\pi^*$    | 159.87  | 0.88 | 0.374 |
|  | N1-C12 | $\sigma$ | C4-C9    | $\sigma^*$ | 111.39  | 1.39 | 0.353 |
|  | N1-C12 | $\sigma$ | C6-C7    | $\sigma^*$ | 50.19   | 1.66 | 0.258 |
|  | N1-C12 | $\sigma$ | C6-C7    | $\pi^*$    | 43.05   | 1.14 | 0.219 |
|  | N1-C12 | $\sigma$ | C7-C8    | $\sigma^*$ | 342.15  | 1.05 | 0.536 |
|  | N1-C12 | $\sigma$ | C8-H8    | $\sigma^*$ | 404.57  | 0.89 | 0.537 |
|  | N1-C12 | $\sigma$ | C8-C9    | $\sigma^*$ | 76.17   | 1.52 | 0.305 |
|  | N1-C12 | $\sigma$ | C9-C10   | $\sigma^*$ | 44.21   | 1.55 | 0.234 |
|  | N1-C12 | $\sigma$ | C10-C11  | $\pi^*$    | 32.57   | 1.13 | 0.185 |

|  |        |          |          |            |         |      |       |
|--|--------|----------|----------|------------|---------|------|-------|
|  | N1-C12 | $\sigma$ | C13-C14  | $\sigma^*$ | 25.55   | 1.62 | 0.183 |
|  | N1-C12 | $\sigma$ | C15-C16  | $\sigma^*$ | 102.89  | 1.43 | 0.344 |
|  | N1-C12 | $\sigma$ | C16-H16A | $\sigma^*$ | 486.04  | 0.81 | 0.560 |
|  | N1-C12 | $\sigma$ | C16-H16B | $\sigma^*$ | 3645.75 | 0.19 | 0.739 |
|  | N1-C12 | $\sigma$ | C17-H17A | $\sigma^*$ | 36.77   | 1.55 | 0.213 |
|  | N1-C12 | $\sigma$ | C18-C19  | $\pi^*$    | 292.45  | 0.86 | 0.490 |
|  | N1-C12 | $\sigma$ | C18-C23  | $\sigma^*$ | 32.68   | 3.57 | 0.30  |
|  | N1-C12 | $\sigma$ | C19-C20  | $\sigma^*$ | 284.68  | 1.26 | 0.534 |
|  | N1-C12 | $\sigma$ | C20-H20  | $\sigma^*$ | 52.51   | 1.50 | 0.251 |
|  | N1-C12 | $\sigma$ | C20-C21  | $\sigma^*$ | 404.70  | 1.09 | 0.595 |
|  | N1-C12 | $\sigma$ | C20-C21  | $\pi^*$    | 1853.10 | 0.25 | 0.678 |
|  | N1-C12 | $\sigma$ | C22-C23  | $\sigma^*$ | 854.05  | 1.56 | 1.029 |
|  | N1-C12 | $\sigma$ | C22-C23  | $\pi^*$    | 549.35  | 1.36 | 0.838 |
|  | N2-C12 | $\sigma$ | C8-H8    | $\sigma^*$ | 11.48   | 0.55 | 0.071 |
|  | N2-C12 | $\sigma$ | C16-H16B | $\sigma^*$ | 15.19   | 0.47 | 0.075 |
|  | N2-C12 | $\sigma$ | C22-C23  | $\sigma^*$ | 19.62   | 1.21 | 0.138 |
|  | N2-C12 | $\sigma$ | C22-C23  | $\pi^*$    | 11.89   | 1.02 | 0.107 |
|  | N2-C13 | $\pi$    | N4-C12   | $\pi^*$    | 40.61   | 0.31 | 0.103 |
|  | N2-C13 | $\sigma$ | C1-C2    | $\sigma^*$ | 22.74   | 1.02 | 0.137 |
|  | N2-C13 | $\sigma$ | C1-C10   | $\sigma^*$ | 14.43   | 1.21 | 0.119 |
|  | N2-C13 | $\sigma$ | C4-C5    | $\sigma^*$ | 54.14   | 0.89 | 0.196 |
|  | N2-C13 | $\sigma$ | C4-C5    | $\pi^*$    | 36.89   | 0.59 | 0.148 |
|  | N2-C13 | $\sigma$ | C4-C9    | $\sigma^*$ | 23.23   | 1.11 | 0.144 |
|  | N2-C13 | $\sigma$ | C6-C7    | $\sigma^*$ | 10.39   | 1.38 | 0.107 |
|  | N2-C13 | $\sigma$ | C6-C7    | $\pi^*$    | 10.59   | 0.85 | 0.094 |
|  | N2-C13 | $\sigma$ | C7-C8    | $\sigma^*$ | 71.83   | 0.77 | 0.21  |
|  | N2-C13 | $\sigma$ | C8-H8    | $\sigma^*$ | 87.74   | 0.61 | 0.206 |
|  | N2-C13 | $\sigma$ | C8-C9    | $\sigma^*$ | 16.17   | 1.24 | 0.127 |
|  | N2-C13 | $\sigma$ | C13-C14  | $\sigma^*$ | 13.28   | 1.34 | 0.120 |
|  | N2-C13 | $\sigma$ | C15-C16  | $\sigma^*$ | 14.75   | 1.15 | 0.117 |
|  | N2-C13 | $\sigma$ | C16-H16B | $\sigma^*$ | 128.65  | 0.52 | 0.232 |
|  | N2-C13 | $\sigma$ | C18-C19  | $\pi^*$    | 44.47   | 0.57 | 0.156 |

|  |        |          |          |            |        |      |       |
|--|--------|----------|----------|------------|--------|------|-------|
|  | N2-C13 | $\sigma$ | C19-C20  | $\sigma^*$ | 76.74  | 0.97 | 0.244 |
|  | N2-C13 | $\sigma$ | C20-C21  | $\sigma^*$ | 111.52 | 0.80 | 0.269 |
|  | N2-C13 | $\sigma$ | C22-C23  | $\sigma^*$ | 198.68 | 1.27 | 0.449 |
|  | N2-C13 | $\sigma$ | C22-C23  | $\pi^*$    | 130.96 | 1.08 | 0.364 |
|  | N4-C12 | $\pi$    | C8-H8    | $\sigma^*$ | 22.95  | 0.01 | 0.016 |
|  | C2-C3  | $\pi$    | C1       | LP*        | 169.24 | 0.04 | 0.085 |
|  | C4-C5  | $\pi$    | C1       | LP*        | 13.36  | 0.02 | 0.014 |
|  | C4-C5  | $\pi$    | C2-C3    | $\pi^*$    | 32.58  | 0.23 | 0.082 |
|  | C4-C5  | $\pi$    | C6-C7    | $\pi^*$    | 49.83  | 0.18 | 0.086 |
|  | C4-C5  | $\pi$    | C7-C8    | $\sigma^*$ | 18.42  | 0.10 | 0.043 |
|  | C4-C5  | $\pi$    | C8-C9    | $\pi^*$    | 22.75  | 0.28 | 0.071 |
|  | C4-C5  | $\pi$    | C20-C21  | $\sigma^*$ | 21.16  | 0.14 | 0.053 |
|  | C4-C5  | $\pi$    | C22-C23  | $\sigma^*$ | 12.57  | 0.60 | 0.086 |
|  | C4-C5  | $\pi$    | C22-C23  | $\pi^*$    | 14.04  | 0.41 | 0.069 |
|  | C4-C9  | $\sigma$ | C4-C5    | $\sigma^*$ | 27.48  | 0.65 | 0.120 |
|  | C4-C9  | $\sigma$ | C8-H8    | $\sigma^*$ | 42.41  | 0.37 | 0.113 |
|  | C4-C9  | $\sigma$ | C16-H16B | $\sigma^*$ | 19.54  | 0.29 | 0.067 |
|  | C4-C9  | $\sigma$ | C20-C21  | $\sigma^*$ | 11.46  | 0.57 | 0.072 |
|  | C4-C9  | $\sigma$ | C22-C23  | $\sigma^*$ | 12.72  | 1.04 | 0.103 |
|  | C4-C9  | $\sigma$ | C22-C23  | $\pi^*$    | 14.59  | 0.84 | 0.107 |
|  | C6-H6  | $\sigma$ | C4-C5    | $\sigma^*$ | 44.10  | 0.50 | 0.132 |
|  | C6-H6  | $\sigma$ | C4-C5    | $\pi^*$    | 19.45  | 0.20 | 0.063 |
|  | C6-H6  | $\sigma$ | C8-H8    | $\sigma^*$ | 52.16  | 0.22 | 0.095 |
|  | C6-H6  | $\sigma$ | C16-H16B | $\sigma^*$ | 80.08  | 0.13 | 0.091 |
|  | C6-H6  | $\sigma$ | C18-C19  | $\pi^*$    | 34.71  | 0.18 | 0.077 |
|  | C6-H6  | $\sigma$ | C19-C20  | $\sigma^*$ | 17.42  | 0.58 | 0.090 |
|  | C6-H6  | $\sigma$ | C20-C21  | $\sigma^*$ | 30.13  | 0.41 | 0.100 |
|  | C6-H6  | $\sigma$ | C22-C23  | $\sigma^*$ | 37.78  | 0.88 | 0.163 |
|  | C6-H6  | $\sigma$ | C22-C23  | $\pi^*$    | 32.30  | 0.69 | 0.144 |
|  | C6-C7  | $\sigma$ | C8-H8    | $\sigma^*$ | 10.88  | 0.38 | 0.058 |
|  | C6-C7  | $\sigma$ | C8-C9    | $\pi^*$    | 18.83  | 0.28 | 0.065 |
|  | C7-H7  | $\sigma$ | C8-H8    | $\sigma^*$ | 14.63  | 0.21 | 0.049 |

|  |          |          |          |            |        |      |       |
|--|----------|----------|----------|------------|--------|------|-------|
|  | C8-C9    | $\pi$    | C1       | LP*        | 22.37  | 0.02 | 0.019 |
|  | C8-C9    | $\pi$    | C6-C7    | $\pi^*$    | 25.79  | 0.19 | 0.062 |
|  | C8-C9    | $\pi$    | C10-C11  | $\pi^*$    | 10.53  | 0.18 | 0.040 |
|  | C10-C11  | $\pi$    | C1       | LP*        | 233.38 | 0.03 | 0.093 |
|  | C10-C11  | $\pi$    | C8-C9    | $\pi^*$    | 18.92  | 0.30 | 0.068 |
|  | C13-C14  | $\sigma$ | C14-C15  | $\sigma^*$ | 13.60  | 0.93 | 0.101 |
|  | C13-C14  | $\sigma$ | C18-C19  | $\sigma^*$ | 33.62  | 0.36 | 0.106 |
|  | C14-C15  | $\pi$    | N2-C13   | $\pi^*$    | 33.02  | 0.25 | 0.085 |
|  | C14-C15  | $\pi$    | N4-C12   | $\pi^*$    | 10.48  | 0.26 | 0.048 |
|  | C14-C15  | $\pi$    | C7-C8    | $\sigma^*$ | 11.60  | 0.12 | 0.036 |
|  | C14-C18  | $\sigma$ | C11-C21  | $\sigma^*$ | 10.20  | 0.63 | 0.072 |
|  | C14-C18  | $\sigma$ | C1-C2    | $\sigma^*$ | 29.89  | 0.75 | 0.134 |
|  | C14-C18  | $\sigma$ | C4-C5    | $\pi^*$    | 20.60  | 0.32 | 0.080 |
|  | C14-C18  | $\sigma$ | C7-C8    | $\sigma^*$ | 34.08  | 0.49 | 0.116 |
|  | C14-C18  | $\sigma$ | C8-H8    | $\sigma^*$ | 68.48  | 0.33 | 0.135 |
|  | C14-C18  | $\sigma$ | C15-C16  | $\sigma^*$ | 19.75  | 0.87 | 0.117 |
|  | C14-C18  | $\sigma$ | C16-H16B | $\sigma^*$ | 44.62  | 0.25 | 0.09  |
|  | C14-C18  | $\sigma$ | C18-C19  | $\pi^*$    | 140.64 | 0.29 | 0.198 |
|  | C17-H17A | $\sigma$ | C16-H16B | $\sigma^*$ | 15.28  | 0.10 | 0.035 |
|  | C18-C19  | $\sigma$ | C18-C19  | $\pi^*$    | 19.84  | 0.36 | 0.082 |
|  | C18-C19  | $\pi$    | C22-C23  | $\pi^*$    | 21.82  | 0.42 | 0.086 |
|  | C18-C23  | $\sigma$ | C1       | LP*        | 47.34  | 0.50 | 0.177 |
|  | C18-C23  | $\sigma$ | C11-C21  | $\sigma^*$ | 71.39  | 0.73 | 0.204 |
|  | C18-C23  | $\sigma$ | O1-C1    | $\sigma^*$ | 32.25  | 1.17 | 0.174 |
|  | C18-C23  | $\sigma$ | N3-H3B   | $\sigma^*$ | 13.36  | 1.10 | 0.109 |
|  | C18-C23  | $\sigma$ | N3-C13   | $\sigma^*$ | 23.52  | 1.13 | 0.146 |
|  | C18-C23  | $\sigma$ | N4-C12   | $\sigma^*$ | 16.67  | 1.21 | 0.127 |
|  | C18-C23  | $\sigma$ | C1-C2    | $\sigma^*$ | 186.71 | 0.85 | 0.356 |
|  | C18-C23  | $\sigma$ | C1-C10   | $\sigma^*$ | 36.44  | 1.03 | 0.174 |
|  | C18-C23  | $\sigma$ | C2-C3    | $\sigma^*$ | 13.89  | 1.29 | 0.120 |
|  | C18-C23  | $\sigma$ | C2-C3    | $\pi^*$    | 23.00  | 0.72 | 0.119 |
|  | C18-C23  | $\sigma$ | C3-H3    | $\sigma^*$ | 20.72  | 1.10 | 0.135 |

|  |         |          |          |            |        |      |       |
|--|---------|----------|----------|------------|--------|------|-------|
|  | C18-C23 | $\sigma$ | C4-C5    | $\sigma^*$ | 192.97 | 0.71 | 0.331 |
|  | C18-C23 | $\sigma$ | C4-C5    | $\pi^*$    | 207.61 | 0.42 | 0.292 |
|  | C18-C23 | $\sigma$ | C4-C9    | $\sigma^*$ | 100.53 | 0.93 | 0.273 |
|  | C18-C23 | $\sigma$ | C6-C7    | $\sigma^*$ | 32.05  | 1.20 | 0.176 |
|  | C18-C23 | $\sigma$ | C6-C7    | $\pi^*$    | 27.87  | 0.67 | 0.135 |
|  | C18-C23 | $\sigma$ | C7-C8    | $\sigma^*$ | 385.71 | 0.59 | 0.428 |
|  | C18-C23 | $\sigma$ | C8-H8    | $\sigma^*$ | 581.82 | 0.43 | 0.448 |
|  | C18-C23 | $\sigma$ | C8-C9    | $\sigma^*$ | 52.23  | 1.06 | 0.210 |
|  | C18-C23 | $\sigma$ | C9-C10   | $\sigma^*$ | 35.78  | 1.08 | 0.176 |
|  | C18-C23 | $\sigma$ | C10-C11  | $\pi^*$    | 21.98  | 0.67 | 0.116 |
|  | C18-C23 | $\sigma$ | C13-C14  | $\sigma^*$ | 25.86  | 1.16 | 0.155 |
|  | C18-C23 | $\sigma$ | C15-C16  | $\sigma^*$ | 166.52 | 0.97 | 0.359 |
|  | C18-C23 | $\sigma$ | C16-H16B | $\sigma^*$ | 604.48 | 0.34 | 0.409 |
|  | C18-C23 | $\sigma$ | C17-H17A | $\sigma^*$ | 63.59  | 1.08 | 0.236 |
|  | C18-C23 | $\sigma$ | C18-C19  | $\pi^*$    | 758.97 | 0.39 | 0.532 |
|  | C18-C23 | $\sigma$ | C18-C23  | $\sigma^*$ | 17.47  | 3.11 | 0.208 |
|  | C18-C23 | $\sigma$ | C19-C20  | $\sigma^*$ | 126.43 | 0.79 | 0.284 |
|  | C18-C23 | $\sigma$ | C20-H20  | $\sigma^*$ | 41.35  | 1.04 | 0.186 |
|  | C18-C23 | $\sigma$ | C20-C21  | $\sigma^*$ | 214.08 | 0.63 | 0.327 |
|  | C18-C23 | $\sigma$ | C22-C23  | $\sigma^*$ | 389.83 | 1.09 | 0.585 |
|  | C18-C23 | $\sigma$ | C22-C23  | $\pi^*$    | 384.68 | 0.90 | 0.567 |
|  | C19-C20 | $\sigma$ | C20-C21  | $\sigma^*$ | 11.52  | 0.59 | 0.074 |
|  | C20-C21 | $\pi$    | C22-C23  | $\pi^*$    | 14.87  | 0.44 | 0.072 |
|  | C21-C22 | $\sigma$ | C18-C19  | $\pi^*$    | 26.13  | 0.39 | 0.099 |
|  | C21-C22 | $\sigma$ | C20-C21  | $\sigma^*$ | 19.11  | 0.62 | 0.098 |
|  | C22-H22 | $\sigma$ | C1-C2    | $\sigma^*$ | 36.67  | 0.65 | 0.139 |
|  | C22-H22 | $\sigma$ | C4-C5    | $\sigma^*$ | 18.85  | 0.52 | 0.088 |
|  | C22-H22 | $\sigma$ | C4-C5    | $\pi^*$    | 39.21  | 0.22 | 0.093 |
|  | C22-H22 | $\sigma$ | C4-C9    | $\sigma^*$ | 11.18  | 0.74 | 0.081 |
|  | C22-H22 | $\sigma$ | C7-C8    | $\sigma^*$ | 57.89  | 0.40 | 0.136 |
|  | C22-H22 | $\sigma$ | C8-H8    | $\sigma^*$ | 120.41 | 0.24 | 0.151 |
|  | C22-H22 | $\sigma$ | C15-C16  | $\sigma^*$ | 24.66  | 0.78 | 0.124 |

|  |         |          |          |            |        |      |       |
|--|---------|----------|----------|------------|--------|------|-------|
|  | C22-H22 | $\sigma$ | C16-H16B | $\sigma^*$ | 107.54 | 0.15 | 0.115 |
|  | C22-H22 | $\sigma$ | C17-H17A | $\sigma^*$ | 11.80  | 0.89 | 0.092 |
|  | C22-H22 | $\sigma$ | C18-C19  | $\pi^*$    | 225.24 | 0.20 | 0.208 |
|  | C22-H22 | $\sigma$ | C22-C23  | $\sigma^*$ | 60.17  | 0.90 | 0.208 |
|  | C22-H22 | $\sigma$ | C22-C23  | $\pi^*$    | 22.57  | 0.71 | 0.122 |
|  | C22-C23 | $\sigma$ | C1       | LP*        | 48.73  | 0.48 | 0.174 |
|  | C22-C23 | $\sigma$ | C11-C21  | $\sigma^*$ | 121.29 | 0.70 | 0.261 |
|  | C22-C23 | $\sigma$ | O1-C1    | $\sigma^*$ | 32.26  | 1.14 | 0.172 |
|  | C22-C23 | $\sigma$ | N3-H3B   | $\sigma^*$ | 12.91  | 1.08 | 0.106 |
|  | C22-C23 | $\sigma$ | N3-C13   | $\sigma^*$ | 25.70  | 1.10 | 0.151 |
|  | C22-C23 | $\sigma$ | N4-C12   | $\sigma^*$ | 16.29  | 1.18 | 0.124 |
|  | C22-C23 | $\sigma$ | C1-C2    | $\sigma^*$ | 198.02 | 0.82 | 0.360 |
|  | C22-C23 | $\sigma$ | C1-C10   | $\sigma^*$ | 45.20  | 1.01 | 0.192 |
|  | C22-C23 | $\sigma$ | C2-C3    | $\sigma^*$ | 13.83  | 1.26 | 0.118 |
|  | C22-C23 | $\sigma$ | C2-C3    | $\pi^*$    | 22.92  | 0.69 | 0.116 |
|  | C22-C23 | $\sigma$ | C3-H3    | $\sigma^*$ | 20.17  | 1.07 | 0.132 |
|  | C22-C23 | $\sigma$ | C4-C5    | $\sigma^*$ | 197.10 | 0.68 | 0.328 |
|  | C22-C23 | $\sigma$ | C4-C5    | $\pi^*$    | 226.23 | 0.39 | 0.294 |
|  | C22-C23 | $\sigma$ | C4-C9    | $\sigma^*$ | 103.13 | 0.90 | 0.272 |
|  | C22-C23 | $\sigma$ | C6-C7    | $\sigma^*$ | 38.19  | 1.17 | 0.190 |
|  | C22-C23 | $\sigma$ | C6-C7    | $\pi^*$    | 34.95  | 0.65 | 0.148 |
|  | C22-C23 | $\sigma$ | C7-C8    | $\sigma^*$ | 402.60 | 0.56 | 0.427 |
|  | C22-C23 | $\sigma$ | C8-H8    | $\sigma^*$ | 624.78 | 0.40 | 0.449 |
|  | C22-C23 | $\sigma$ | C8-C9    | $\sigma^*$ | 60.54  | 1.03 | 0.224 |
|  | C22-C23 | $\sigma$ | C9-C10   | $\sigma^*$ | 35.87  | 1.05 | 0.174 |
|  | C22-C23 | $\sigma$ | C10-C11  | $\pi^*$    | 23.06  | 0.64 | 0.116 |
|  | C22-C23 | $\sigma$ | C13-C14  | $\sigma^*$ | 22.97  | 1.13 | 0.144 |
|  | C22-C23 | $\sigma$ | C15-C16  | $\sigma^*$ | 139.41 | 0.94 | 0.324 |
|  | C22-C23 | $\sigma$ | C16-H16B | $\sigma^*$ | 642.46 | 0.32 | 0.404 |
|  | C22-C23 | $\sigma$ | C17-H17A | $\sigma^*$ | 63.66  | 1.06 | 0.233 |
|  | C22-C23 | $\sigma$ | C18-C19  | $\pi^*$    | 827.31 | 0.36 | 0.535 |
|  | C22-C23 | $\sigma$ | C19-C20  | $\sigma^*$ | 138.68 | 0.76 | 0.292 |

|  |         |          |          |            |         |      |       |
|--|---------|----------|----------|------------|---------|------|-------|
|  | C22-C23 | $\sigma$ | C20-H20  | $\sigma^*$ | 54.36   | 1.01 | 0.210 |
|  | C22-C23 | $\sigma$ | C20-C21  | $\sigma^*$ | 266.14  | 0.60 | 0.356 |
|  | C22-C23 | $\sigma$ | C22-C23  | $\sigma^*$ | 832.74  | 1.07 | 0.844 |
|  | C22-C23 | $\sigma$ | C22-C23  | $\pi^*$    | 393.95  | 0.87 | 0.564 |
|  | C23-H23 | $\sigma$ | C11-C21  | $\sigma^*$ | 77.20   | 0.08 | 0.072 |
|  | C23-H23 | $\sigma$ | O2-C1    | $\sigma^*$ | 21.79   | 0.52 | 0.095 |
|  | C23-H23 | $\sigma$ | N3-H3B   | $\sigma^*$ | 20.65   | 0.46 | 0.087 |
|  | C23-H23 | $\sigma$ | N3-C13   | $\sigma^*$ | 18.35   | 0.48 | 0.084 |
|  | C23-H23 | $\sigma$ | N4-C12   | $\sigma^*$ | 16.21   | 0.56 | 0.085 |
|  | C23-H23 | $\sigma$ | C1-C2    | $\sigma^*$ | 135.13  | 0.20 | 0.147 |
|  | C23-H23 | $\sigma$ | C1-C10   | $\sigma^*$ | 75.75   | 0.39 | 0.154 |
|  | C23-H23 | $\sigma$ | C2-C3    | $\sigma^*$ | 17.67   | 0.64 | 0.095 |
|  | C23-H23 | $\sigma$ | C2-C3    | $\pi^*$    | 83.12   | 0.07 | 0.072 |
|  | C23-H23 | $\sigma$ | C3-H3    | $\sigma^*$ | 22.83   | 0.45 | 0.091 |
|  | C23-H23 | $\sigma$ | C4-C5    | $\sigma^*$ | 1349.18 | 0.06 | 0.260 |
|  | C23-H23 | $\sigma$ | C4-C9    | $\sigma^*$ | 147.28  | 0.28 | 0.183 |
|  | C23-H23 | $\sigma$ | C6-C7    | $\sigma^*$ | 39.33   | 0.55 | 0.132 |
|  | C23-H23 | $\sigma$ | C6-C7    | $\pi^*$    | 492.58  | 0.03 | 0.113 |
|  | C23-H23 | $\sigma$ | C8-C9    | $\sigma^*$ | 79.59   | 0.41 | 0.162 |
|  | C23-H23 | $\sigma$ | C9-C10   | $\sigma^*$ | 37.99   | 0.43 | 0.115 |
|  | C23-H23 | $\sigma$ | C10-C11  | $\pi^*$    | 654.23  | 0.02 | 0.107 |
|  | C23-H23 | $\sigma$ | C13-C14  | $\sigma^*$ | 19.16   | 0.51 | 0.089 |
|  | C23-H23 | $\sigma$ | C15-C16  | $\sigma^*$ | 92.33   | 0.32 | 0.154 |
|  | C23-H23 | $\sigma$ | C17-H17A | $\sigma^*$ | 22.22   | 0.44 | 0.088 |
|  | C23-H23 | $\sigma$ | C18-C23  | $\sigma^*$ | 12.83   | 2.46 | 0.159 |
|  | C23-H23 | $\sigma$ | C19-C20  | $\sigma^*$ | 806.57  | 0.15 | 0.306 |
|  | C23-H23 | $\sigma$ | C20-H20  | $\sigma^*$ | 38.13   | 0.39 | 0.109 |
|  | C23-H23 | $\sigma$ | C22-C23  | $\sigma^*$ | 701.89  | 0.45 | 0.500 |
|  | C23-H23 | $\sigma$ | C22-C23  | $\pi^*$    | 709.38  | 0.25 | 0.409 |
|  | C11     | LP       | C20-C21  | $\sigma^*$ | 11.15   | 0.83 | 0.086 |
|  | C11     | LP       | C8-H8    | $\sigma^*$ | 11.24   | 0.02 | 0.013 |
|  | C11     | LP       | C20-C21  | $\sigma^*$ | 27.33   | 0.21 | 0.068 |

|  |     |    |         |            |         |      |       |
|--|-----|----|---------|------------|---------|------|-------|
|  | C11 | LP | C7-C8   | $\sigma^*$ | 10.18   | 0.18 | 0.039 |
|  | C11 | LP | C8-H8   | $\sigma^*$ | 94.00   | 0.02 | 0.039 |
|  | C11 | LP | C20-C21 | $\sigma^*$ | 11.49   | 0.22 | 0.045 |
|  | C11 | LP | C22-C23 | $\sigma^*$ | 12.04   | 0.68 | 0.082 |
|  | C11 | LP | C22-C23 | $\pi^*$    | 10.13   | 0.49 | 0.067 |
|  | O1  | LP | N1-H1   | $\sigma^*$ | 11.43   | 0.67 | 0.079 |
|  | O1  | LP | C1-C2   | $\sigma^*$ | 32.45   | 0.39 | 0.102 |
|  | O1  | LP | C1-C10  | $\sigma^*$ | 15.72   | 0.58 | 0.086 |
|  | O1  | LP | C1      | LP*        | 1242.28 | 0.02 | 0.155 |
|  | N1  | LP | N4-C12  | $\pi^*$    | 50.69   | 0.26 | 0.103 |
|  | N1  | LP | C10-C11 | $\pi^*$    | 66.53   | 0.20 | 0.107 |
|  | N2  | LP | N4-C12  | $\sigma^*$ | 13.02   | 0.83 | 0.094 |
|  | N2  | LP | C13-C14 | $\sigma^*$ | 10.38   | 0.79 | 0.082 |
|  | N3  | LP | N2-C13  | $\sigma^*$ | 53.91   | 0.26 | 0.112 |
|  | N4  | LP | C1      | LP*        | 46.37   | 0.23 | 0.115 |
|  | N4  | LP | C11-C21 | $\sigma^*$ | 40.17   | 0.46 | 0.123 |
|  | N4  | LP | O1-C1   | $\sigma^*$ | 15.88   | 0.89 | 0.109 |
|  | N4  | LP | N1-C12  | $\sigma^*$ | 5.40    | 0.84 | 0.103 |
|  | N4  | LP | N3-C13  | $\sigma^*$ | 14.40   | 0.85 | 0.101 |
|  | N4  | LP | N4-C12  | $\sigma^*$ | 11.13   | 0.93 | 0.092 |
|  | N4  | LP | C1-C2   | $\sigma^*$ | 90.14   | 0.57 | 0.205 |
|  | N4  | LP | C1-C10  | $\sigma^*$ | 36.56   | 0.76 | 0.150 |
|  | N4  | LP | C2-C3   | $\pi^*$    | 17.37   | 0.44 | 0.080 |
|  | N4  | LP | C3-H3   | $\sigma^*$ | 12.81   | 0.82 | 0.093 |
|  | N4  | LP | C4-C5   | $\sigma^*$ | 172.63  | 0.43 | 0.249 |
|  | N4  | LP | C4-C5   | $\pi^*$    | 292.13  | 0.14 | 0.197 |
|  | N4  | LP | C4-C9   | $\sigma^*$ | 66.76   | 0.65 | 0.190 |
|  | N4  | LP | C6-C7   | $\sigma^*$ | 25.18   | 0.92 | 0.139 |
|  | N4  | LP | C6-C7   | $\pi^*$    | 36.66   | 0.40 | 0.116 |
|  | N4  | LP | C7-C8   | $\sigma^*$ | 305.10  | 0.32 | 0.283 |
|  | N4  | LP | C8-H8   | $\sigma^*$ | 631.04  | 0.15 | 0.284 |
|  | N4  | LP | C8-C9   | $\sigma^*$ | 40.88   | 0.78 | 0.163 |



|  |    |    |          |            |         |      |       |
|--|----|----|----------|------------|---------|------|-------|
|  | N4 | LP | C9-C10   | $\sigma^*$ | 22.42   | 0.81 | 0.122 |
|  | N4 | LP | C10-C11  | $\pi^*$    | 27.77   | 0.39 | 0.098 |
|  | N4 | LP | C13-C14  | $\sigma^*$ | 5.93    | 0.88 | 0.107 |
|  | N4 | LP | C15-C16  | $\sigma^*$ | 38.06   | 0.69 | 0.148 |
|  | N4 | LP | C16-H16B | $\sigma^*$ | 1709.60 | 0.07 | 0.312 |
|  | N4 | LP | C17-H17A | $\sigma^*$ | 17.64   | 0.81 | 0.109 |
|  | N4 | LP | C18-C19  | $\pi^*$    | 659.02  | 0.12 | 0.265 |
|  | N4 | LP | C19-C20  | $\sigma^*$ | 185.98  | 0.52 | 0.282 |
|  | N4 | LP | C20-H20  | $\sigma^*$ | 29.51   | 0.76 | 0.137 |
|  | N4 | LP | C20-C21  | $\sigma^*$ | 342.64  | 0.35 | 0.315 |
|  | N4 | LP | C22-C23  | $\sigma^*$ | 460.09  | 0.82 | 0.559 |
|  | N4 | LP | C22-C23  | $\pi^*$    | 336.03  | 0.62 | 0.433 |

<sup>a</sup>The interaction energy threshold is 10 kcal/mol.
